# Supplementary material for: Diastereoselective three-component reactions of aryldiazoacetates with alcohols/water and alkynals: application to substituted enelactones
Source: Royal Society of Chemistry journal article supplement (doi:10.1039/c1ob05076a), 2011-01-01

# Diastereoselective Three-component Reactions of Aryldiazoacetates with Alcohols/Water and Alkynals: Application to Substituted Enelactones

Xingchun Han <sup>a, b</sup>, Ming Tang <sup>a</sup>, Liqing Jiang <sup>a</sup> and Wenhao Hu\* <sup>a</sup>

<sup>a</sup> Department of Chemistry, and Institute of Drug Discovery and Development, Shanghai Engineering Research Center for Molecular Therapeutics and New Drug Development, East China Normal University, Shanghai 200062, P. R. China. E-mail: whu@chem.ecnu.edu.cn ; Fax: +86-021-62233176.;

<sup>b</sup> Roche R&D Center (China) Ltd. Shanghai, 201203, China

## Supporting Information

### Table of Contents

1. Crystal data
2. NMR analysis spectra for **4a-1**, **5-8** and UPLC spectra for 4a

## 1. Crystal data

### Crystal data of *syn-4a*

Single-crystal X-ray structure determinations were performed on a Bruker SMART APEX diffractometer

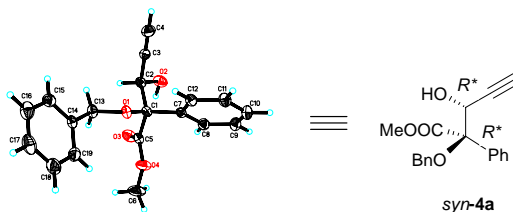

|                                   |                                                                                                                            |
|-----------------------------------|----------------------------------------------------------------------------------------------------------------------------|
| Empirical formula                 | C <sub>19</sub> H <sub>18</sub> O <sub>4</sub>                                                                             |
| Formula weight                    | 310.33                                                                                                                     |
| Temperature                       | 293(2) K                                                                                                                   |
| Wavelength                        | 0.71073 Å                                                                                                                  |
| Crystal system, space group       | Monoclinic, P2(1)/n                                                                                                        |
| Unit cell dimensions              | a = 12.9167(17) Å    alpha = 90 deg.<br>b = 9.8437(13) Å    beta = 107.208(2) deg.<br>c = 13.3798(17) Å    gamma = 90 deg. |
| Volume                            | 1625.1(4) Å <sup>3</sup>                                                                                                   |
| Z, Calculated density             | 4, 1.268 Mg/m <sup>3</sup>                                                                                                 |
| Absorption coefficient            | 0.089 mm <sup>-1</sup>                                                                                                     |
| F(000)                            | 656                                                                                                                        |
| Crystal size                      | 0.390 x 0.301 x 0.127 mm                                                                                                   |
| Theta range for data collection   | 1.93 to 25.99 deg.                                                                                                         |
| Limiting indices                  | -15 ≤ h ≤ 15, -12 ≤ k ≤ 12, -16 ≤ l ≤ 6                                                                                    |
| Reflections collected / unique    | 8645 / 3180 [R(int) = 0.0348]                                                                                              |
| Completeness to theta = 25.99     | 99.7 %                                                                                                                     |
| Absorption correction             | Empirical                                                                                                                  |
| Max. and min. transmission        | 1.0000 and 0.7405                                                                                                          |
| Refinement method                 | Full-matrix least-squares on F <sup>2</sup>                                                                                |
| Data / restraints / parameters    | 3180 / 1 / 213                                                                                                             |
| Goodness-of-fit on F <sup>2</sup> | 0.930                                                                                                                      |
| Final R indices [I > 2σ(I)]       | R1 = 0.0443, wR2 = 0.0955                                                                                                  |
| R indices (all data)              | R1 = 0.0668, wR2 = 0.1038                                                                                                  |
| Largest diff. peak and hole       | 0.167 and -0.150 e.Å <sup>-3</sup>                                                                                         |

CCDC-806582 contains the supplementary crystallographic data for this paper. These data can be obtained free of charge from The Cambridge Crystallographic Data Centre via [www.ccdc.cam.ac.uk/data\\_request/cif](http://www.ccdc.cam.ac.uk/data_request/cif).

## Crystal data of *anti-4j*

Single-crystal X-ray structure determinations were performed on a Bruker SMART APEX diffractometer

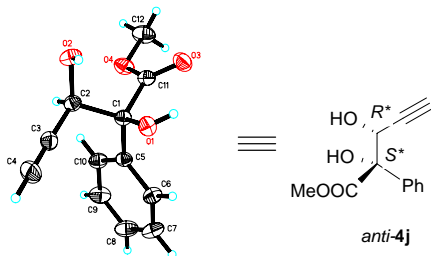

|                                   |                                                                                                                              |
|-----------------------------------|------------------------------------------------------------------------------------------------------------------------------|
| Empirical formula                 | C <sub>12</sub> H <sub>12</sub> O <sub>4</sub>                                                                               |
| Formula weight                    | 220.22                                                                                                                       |
| Temperature                       | 293(2) K                                                                                                                     |
| Wavelength                        | 0.71073 Å                                                                                                                    |
| Crystal system, space group       | Monoclinic, C <sub>2</sub> /c                                                                                                |
| Unit cell dimensions              | a = 10.4347(8) Å    alpha = 90 deg.<br>b = 15.9131(12) Å    beta = 109.4870(10) deg.<br>c = 14.1048(10) Å    gamma = 90 deg. |
| Volume                            | 2207.9(3) Å <sup>3</sup>                                                                                                     |
| Z, Calculated density             | 8, 1.325 Mg/m <sup>3</sup>                                                                                                   |
| Absorption coefficient            | 0.100 mm <sup>-1</sup>                                                                                                       |
| F(000)                            | 928                                                                                                                          |
| Crystal size                      | 0.412 x 0.369 x 0.315 mm                                                                                                     |
| Theta range for data collection   | 2.43 to 25.98 deg.                                                                                                           |
| Limiting indices                  | -10 ≤ h ≤ 12, -18 ≤ k ≤ 19, -17 ≤ l ≤ 14                                                                                     |
| Reflections collected / unique    | 5925 / 2171 [R(int) = 0.0385]                                                                                                |
| Completeness to theta = 25.98     | 99.8 %                                                                                                                       |
| Absorption correction             | Empirical                                                                                                                    |
| Max. and min. transmission        | 1.0000 and 0.5979                                                                                                            |
| Refinement method                 | Full-matrix least-squares on F <sup>2</sup>                                                                                  |
| Data / restraints / parameters    | 2171 / 2 / 155                                                                                                               |
| Goodness-of-fit on F <sup>2</sup> | 1.057                                                                                                                        |
| Final R indices [I > 2σ(I)]       | R1 = 0.0448, wR2 = 0.1267                                                                                                    |
| R indices (all data)              | R1 = 0.0483, wR2 = 0.1299                                                                                                    |
| Extinction coefficient            | 0.0084(11)                                                                                                                   |
| Largest diff. peak and hole       | 0.227 and -0.224 e.Å <sup>-3</sup>                                                                                           |

CCDC-806589 contains the supplementary crystallographic data for this paper. These data can be obtained free of charge from The Cambridge Crystallographic Data Centre via [www.ccdc.cam.ac.uk/data\\_request/cif](http://www.ccdc.cam.ac.uk/data_request/cif).

## 2. NMR analysis spectra for 4a-1, 5-8 and UPLC spectra for 4a

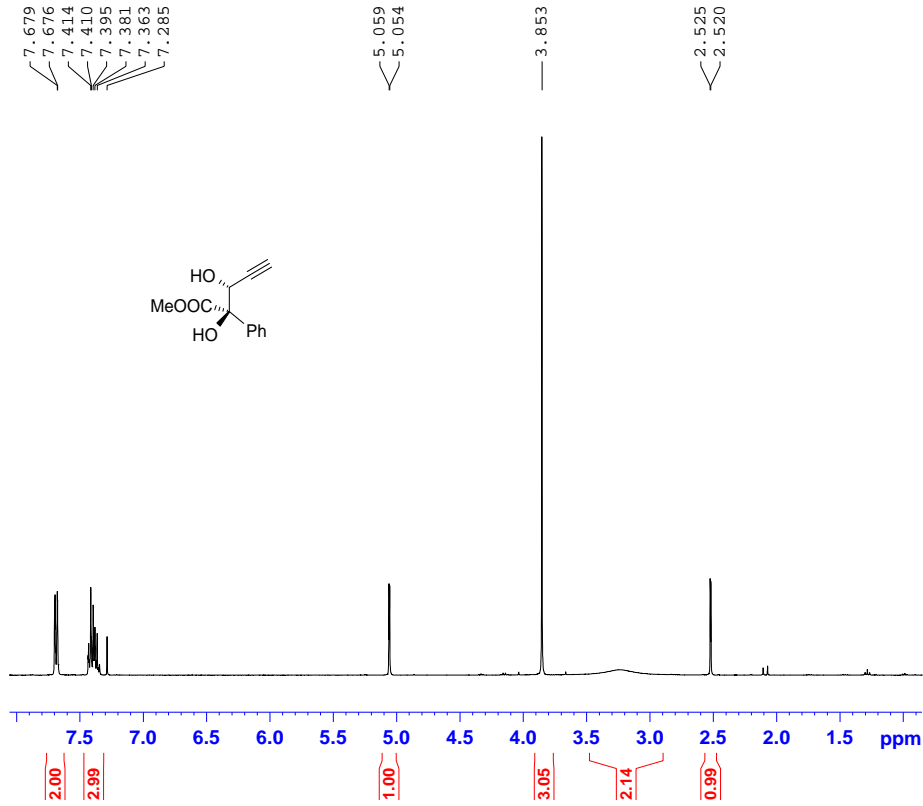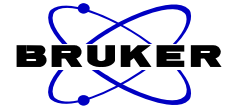

```

NAME      NHBI-2005005-080-A
EXPNO     1
PROCNO    1
Date_     20101105
Time      19.37
INSTRUM   spect
PROBHD    5 mm PABBO BB-
PULPROG   zg30
TD        65536
SOLVENT   CDCl3
NS        16
DS        2
SWH       8278.146 Hz
FIDRES    0.126314 Hz
AQ        3.9584243 sec
RG        228.1
DW        60.400 usec
DE        6.50 usec
TE        298.0 K
D1        1.00000000 sec
TD0       1

===== CHANNEL f1 =====
NUC1      1H
P1        14.50 usec
PL1       -4.00 dB
PL1W      20.75849724 W
SFO1      400.1124708 MHz
SI        32768
SF        400.1100000 MHz
WDW       EM
SSB       0
LB        0.30 Hz
GB        0
PC        1.00
    
```

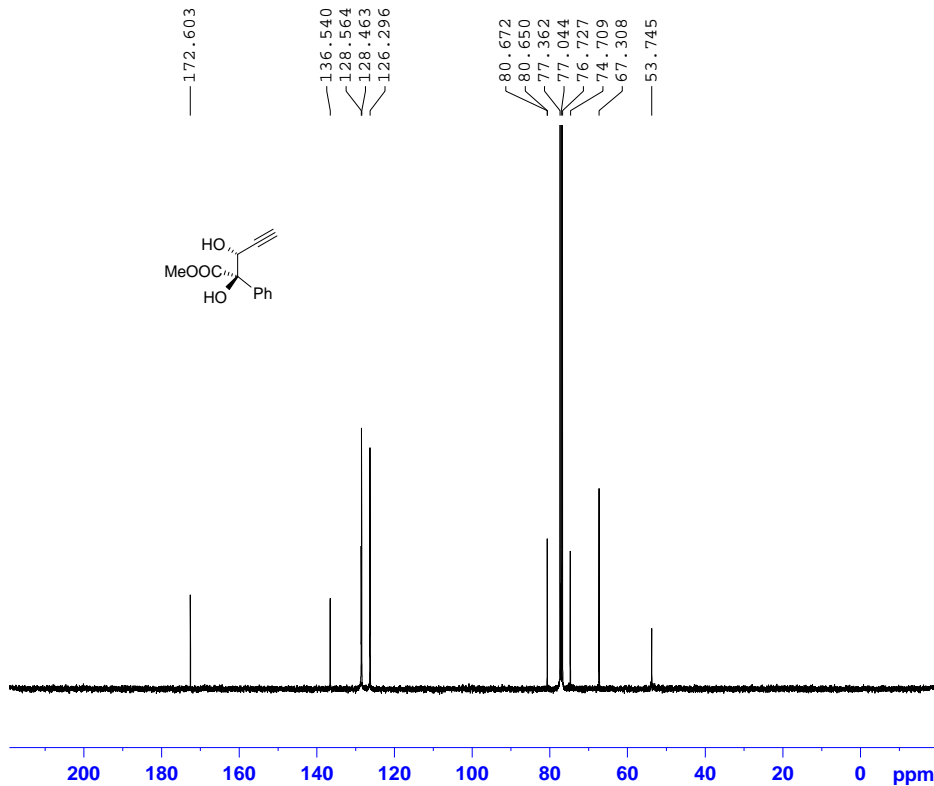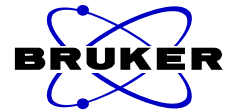

```

NAME      NHBI-2005005-080-A
EXPNO     2
PROCNO    1
Date_     20101105
Time      20.37
INSTRUM   spect
PROBHD    5 mm PABBO BB-
PULPROG   zgpg30
TD        65536
SOLVENT   CDCl3
NS        1024
DS        4
SWH       23980.814 Hz
FIDRES    0.365918 Hz
AQ        1.3664756 sec
RG        9195.2
DW        20.850 usec
DE        6.50 usec
TE        298.1 K
D1        2.00000000 sec
D11       0.03000000 sec
TD0       1

===== CHANNEL f1 =====
NUC1      13C
P1        9.20 usec
PL1       -2.00 dB
PL1W      61.30850601 W
SFO1      100.6178003 MHz

===== CHANNEL f2 =====
CPDPRG2   waltz16
NUC2      1H
PCPD2     80.00 usec
PL2       -4.00 dB
PL12      10.83 dB
PL13      10.83 dB
PL2W      20.75849724 W
PL12W     0.68264657 W
PL13W     0.68264657 W
SFO2      400.1116004 MHz
SI        32768
SF        100.6077400 MHz
WDW       EM
SSB       0
LB        1.00 Hz
GB        0
PC        1.40
    
```

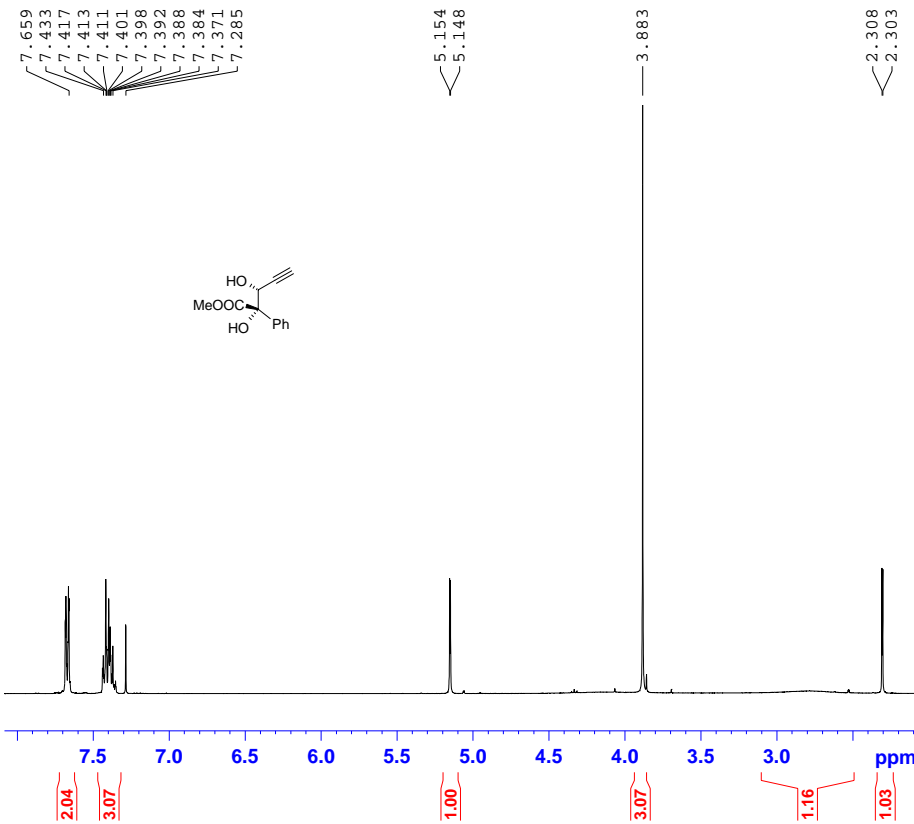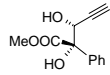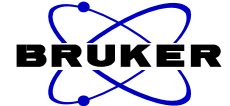

```

NAME      NHB1-2005005-080-B
EXPNO     1
PROCNO    1
Date_     20101105
Time      20.44
INSTRUM   spect
PROBHD    5 mm PABBO BB-
PULPROG   zg30
TD        65536
SOLVENT   CDCl3
NS        16
DS        2
SWH       8278.146 Hz
FIDRES    0.126314 Hz
AQ        3.9584243 sec
RG        362
DW        60.400 usec
DE        6.50 usec
TE        297.9 K
D1        1.00000000 sec
TD0       1

===== CHANNEL f1 =====
NUC1      1H
P1        14.50 usec
PL1       -4.00 dB
PL1W      20.75849724 W
SFO1      400.1124708 MHz
SI        32768
SF        400.1100000 MHz
WDW       EM
SSB       0
LB        0.30 Hz
GB        0
PC        1.00
  
```

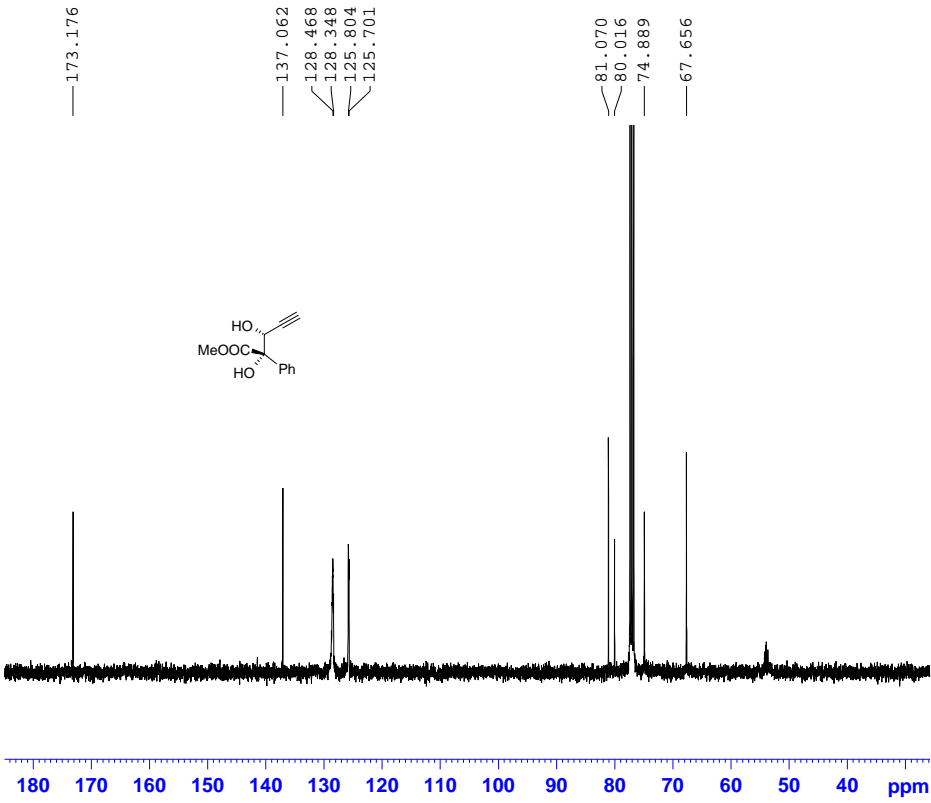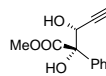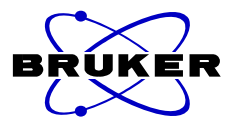

```

NAME      NHB1-2005005-080-B
EXPNO     2
PROCNO    1
Date_     20101105
Time      21.43
INSTRUM   spect
PROBHD    5 mm PABBO BB-
PULPROG   zgpg30
TD        65536
SOLVENT   CDCl3
NS        1024
DS        4
SWH       23980.814 Hz
FIDRES    0.365918 Hz
AQ        1.3664756 sec
RG        32768
DW        20.850 usec
DE        6.50 usec
TE        297.9 K
D1        2.00000000 sec
D11       0.03000000 sec
TD0       1

===== CHANNEL f1 =====
NUC1      13C
P1        9.20 usec
PL1       -2.00 dB
PL1W      61.30850601 W
SFO1      100.6178003 MHz

===== CHANNEL f2 =====
CPDPRG2   waltz16
NUC2      1H
PCPD2     80.00 usec
PL2       -4.00 dB
PL12      10.83 dB
PL13      10.83 dB
PL2W      20.75849724 W
PL12W     0.68264657 W
PL13W     0.68264657 W
SFO2      400.1116004 MHz
SI        32768
SF        100.6077400 MHz
WDW       EM
SSB       0
LB        1.00 Hz
GB        0
PC        1.40
  
```

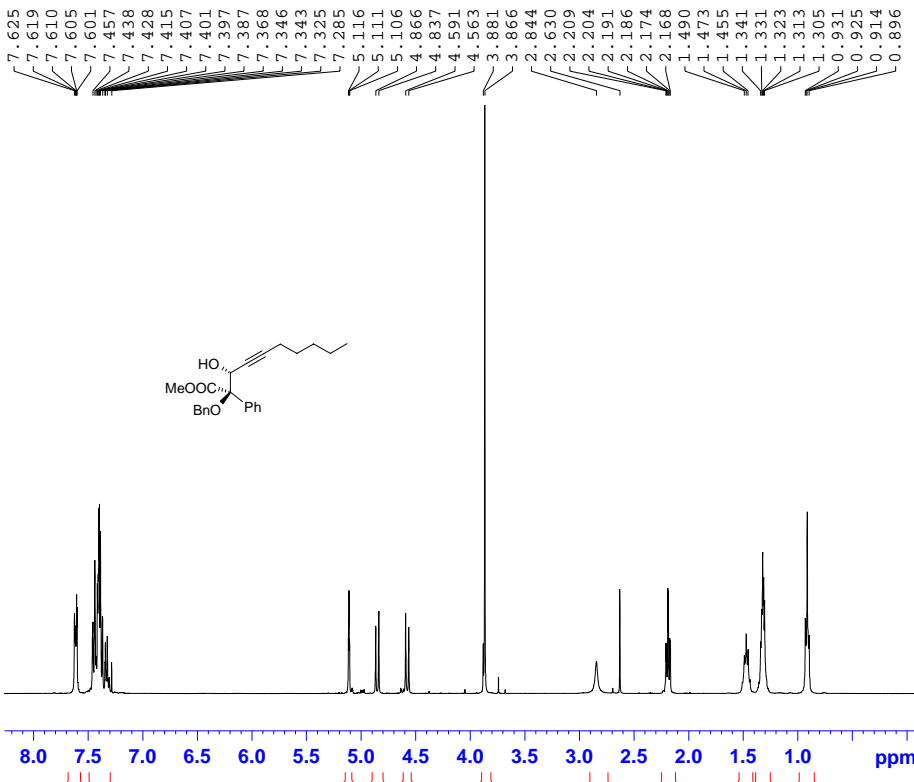

**BRUKER**

```

NAME      NHB1-2005005-110-01
EXPNO    1
PROCNO   1
Date_    20100419
Time     16.36
INSTRUM  spect
PROBHD   5 mm PABBO BB-
PULPROG  zg30
TD       65536
SOLVENT  CDCl3
NS       16
DS       2
SWH      8278.146 Hz
FIDRES   0.126314 Hz
AQ       3.9584243 sec
RG       35.9
DW       60.400 usec
DE       6.50 usec
TE       298.1 K
D1       1.00000000 sec
TD0      1

===== CHANNEL f1 =====
NUC1     1H
P1       13.50 usec
PL1      -1.00 dB
PL1W    10.40389347 W
SFO1    400.1124708 MHz
SI       32768
SF       400.1100000 MHz
WDW      EM
SSB      0
LB       0.30 Hz
GB       0
PC       1.00
  
```

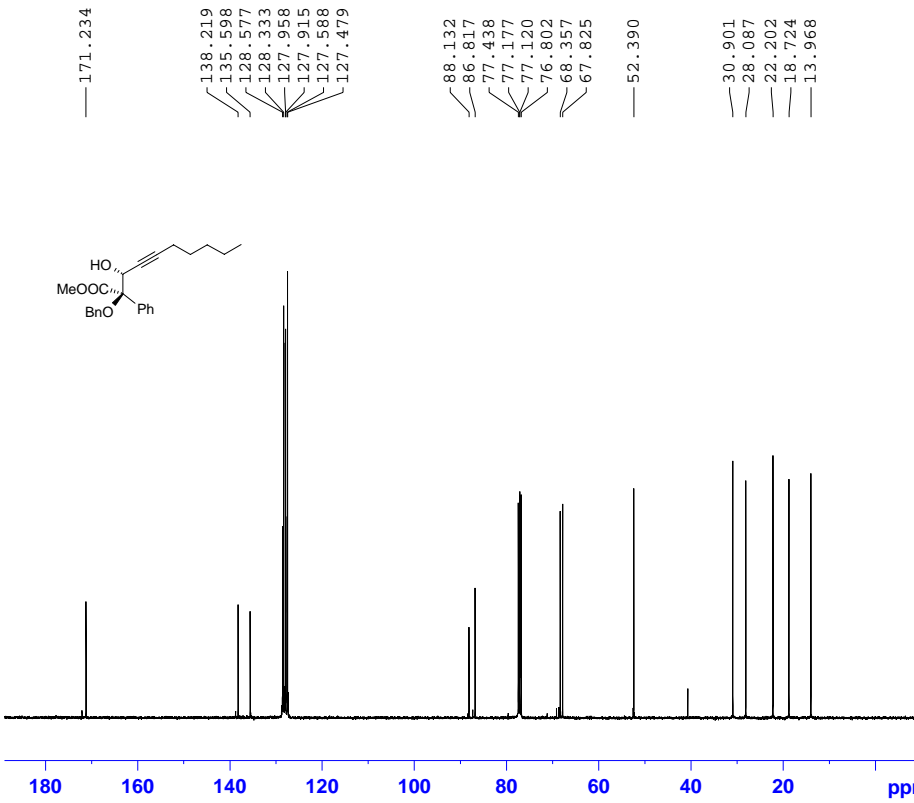

**BRUKER**

```

NAME      NHB1-2005005-110-01
EXPNO    2
PROCNO   1
Date_    20100419
Time     17.36
INSTRUM  spect
PROBHD   5 mm PABBO BB-
PULPROG  zgpg30
TD       65536
SOLVENT  CDCl3
NS       1024
DS       4
SWH      23980.814 Hz
FIDRES   0.365918 Hz
AQ       1.3664756 sec
RG       32768
DW       20.850 usec
DE       6.50 usec
TE       298.4 K
D1       2.00000000 sec
D11      0.03000000 sec
TD0      1

===== CHANNEL f1 =====
NUC1     13C
P1       9.20 usec
PL1      -2.00 dB
PL1W    61.30850601 W
SFO1    100.6178003 MHz

===== CHANNEL f2 =====
CPDPRG2  waltz16
NUC2     1H
PCPD2    80.00 usec
PL2      -1.00 dB
PL12    14.46 dB
PL13    14.00 dB
PL2W    10.40389347 W
PL12W   0.29593471 W
PL13W   0.32900000 W
SFO2    400.1116004 MHz
SI       32768
SF       100.6077400 MHz
WDW      EM
SSB      0
LB       1.00 Hz
GB       0
PC       1.40
  
```

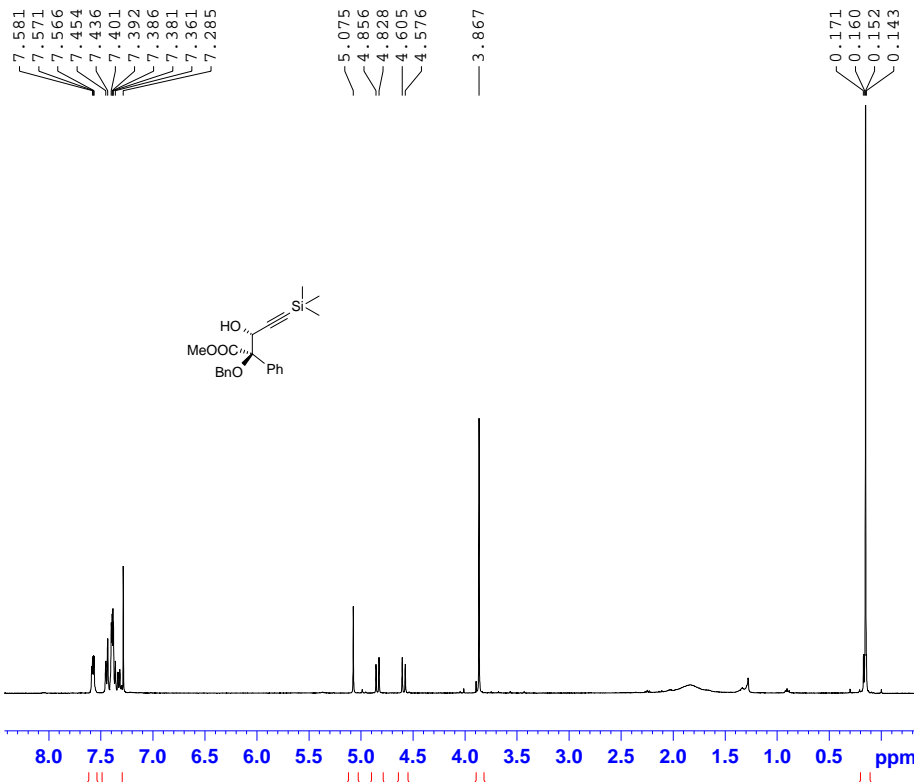

```

NAME      NHB1-2005005-145-01
EXPNO    1
PROCNO   1
Date_    20100926
Time     9.42
INSTRUM  spect
PROBHD   5 mm PABBO BB-
PULPROG  zg30
TD       65536
SOLVENT  CDCl3
NS       16
DS       2
SWH      8278.146 Hz
FIDRES   0.126314 Hz
AQ       3.9584243 sec
RG       362
DW       60.400 usec
DE       6.50 usec
TE       296.6 K
D1       1.00000000 sec
TD0      1
  
```

```

===== CHANNEL f1 =====
NUC1     1H
P1       13.50 usec
PL1      -1.00 dB
PL1W    10.40389347 W
SFO1    400.1124708 MHz
SI       32768
SF       400.1100000 MHz
WDW      EM
SSB      0
LB       0.30 Hz
GB       0
PC       1.00
  
```

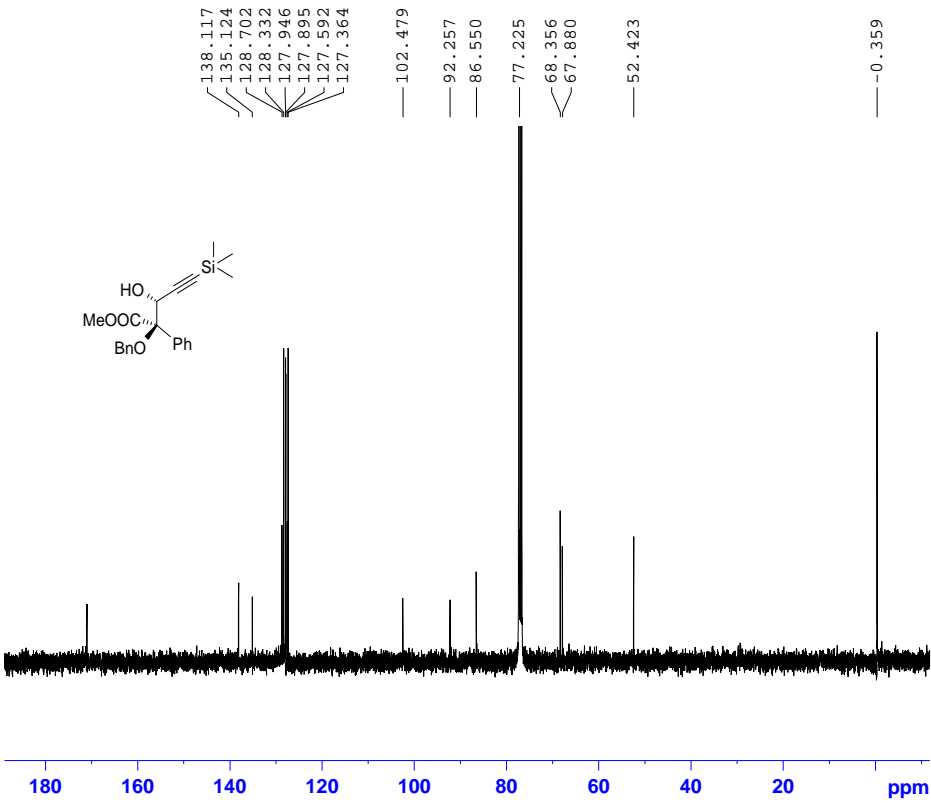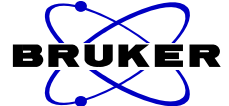

```

NAME      NHB1-2005005-145-01
EXPNO    2
PROCNO   1
Date_    20100926
Time     11.43
INSTRUM  spect
PROBHD   5 mm PABBO BB-
PULPROG  zgpg30
TD       65536
SOLVENT  CDCl3
NS       1024
DS       4
SWH      23980.814 Hz
FIDRES   0.365918 Hz
AQ       1.3664756 sec
RG       5160.6
DW       20.850 usec
DE       6.50 usec
TE       297.2 K
D1       2.00000000 sec
D11      0.03000000 sec
TD0      1
  
```

```

===== CHANNEL f1 =====
NUC1     13C
P1       9.20 usec
PL1      -2.00 dB
PL1W    61.30850601 W
SFO1    100.6178003 MHz

===== CHANNEL f2 =====
CPDPRG2  waltz16
NUC2     1H
PCPD2    80.00 usec
PL2      -1.00 dB
PL12    14.46 dB
PL13    14.00 dB
PL2W    10.40389347 W
PL12W   0.29593471 W
PL13W   0.32900000 W
SFO2    400.1116004 MHz
SI       32768
SF       100.6077400 MHz
WDW      EM
SSB      0
LB       1.00 Hz
GB       0
PC       1.40
  
```

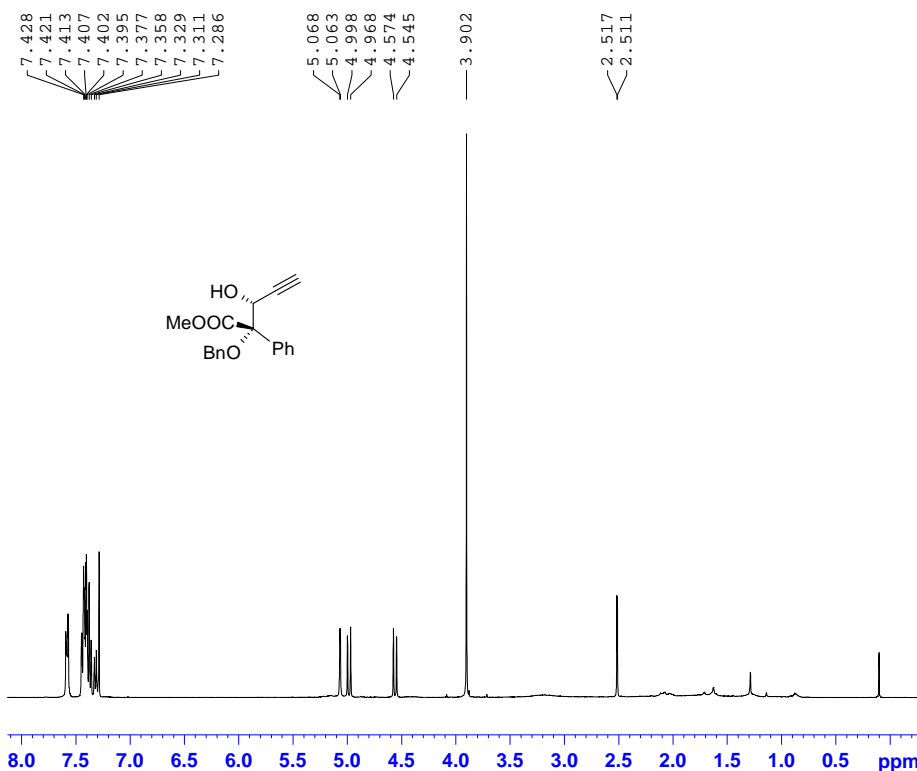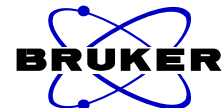

```

NAME      NHB1-2005005-147-1
EXPNO     1
PROCNO    1
Date_     20101029
Time      16.32
INSTRUM   spect
PROBHD    5 mm PABBO BB-
PULPROG   zg30
TD         65536
SOLVENT   CDCl3
NS         16
DS         2
SWH       8278.146 Hz
FIDRES    0.126314 Hz
AQ        3.9584243 sec
RG         256
DW         60.400 usec
DE         6.50 usec
TE         299.0 K
D1         1.00000000 sec
TD0        1
  
```

```

===== CHANNEL f1 =====
NUC1      1H
P1        14.50 usec
PL1       -4.00 dB
PL1W      20.75849724 W
SFO1      400.1124708 MHz
SI         32768
SF         400.1100000 MHz
WDW        EM
SSB         0
LB         0.30 Hz
GB         0
PC         1.00
  
```

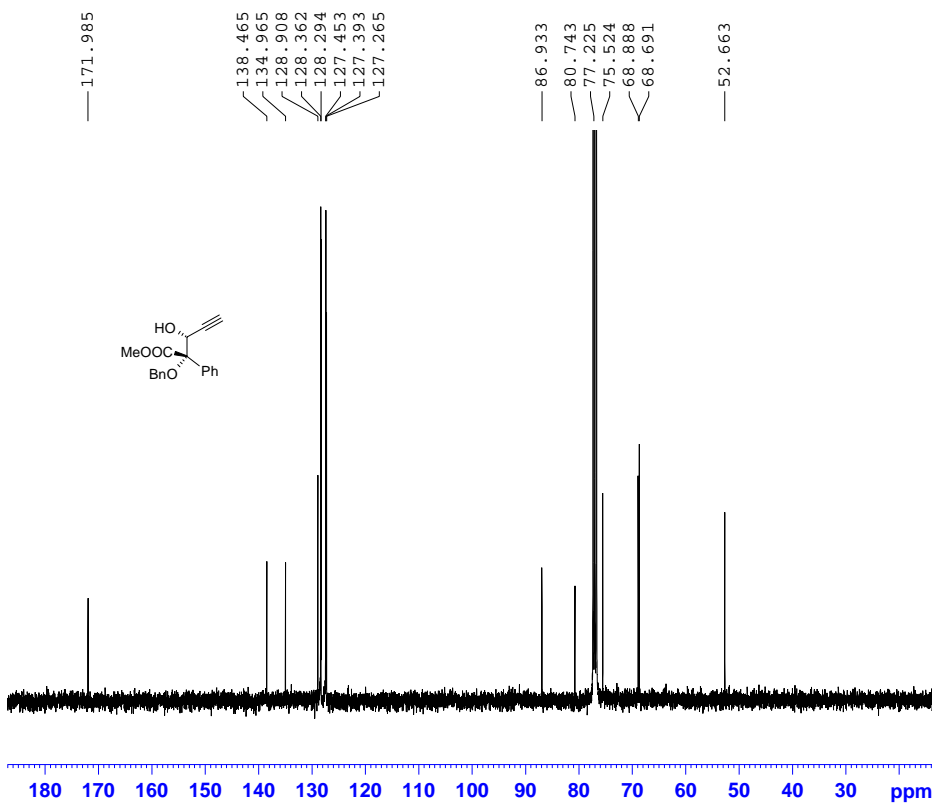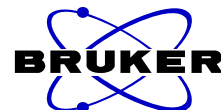

```

NAME      NHB1-2005005-147-1
EXPNO     2
PROCNO    1
Date_     20101029
Time      20.08
INSTRUM   spect
PROBHD    5 mm PABBO BB-
PULPROG   zgpg30
TD         65536
SOLVENT   CDCl3
NS         1024
DS         4
SWH       23980.814 Hz
FIDRES    0.365918 Hz
AQ        1.3664756 sec
RG         32768
DW         20.850 usec
DE         6.50 usec
TE         299.3 K
D1         2.00000000 sec
D11        0.03000000 sec
TD0        1
  
```

```

===== CHANNEL f1 =====
NUC1      13C
P1         9.20 usec
PL1        2.00 dB
PL1W       61.30850601 W
SFO1      100.6178003 MHz

===== CHANNEL f2 =====
CPDPRG2   waltz16
NUC2       1H
PCPD2     80.00 usec
PL2        -4.00 dB
PL12      10.83 dB
PL13      10.83 dB
PL2W      20.75849724 W
PL12W     0.68264657 W
PL13W     0.68264657 W
SFO2      400.1116004 MHz
SI         32768
SF        100.6077400 MHz
WDW        EM
SSB         0
LB         1.00 Hz
GB         0
PC         1.40
  
```



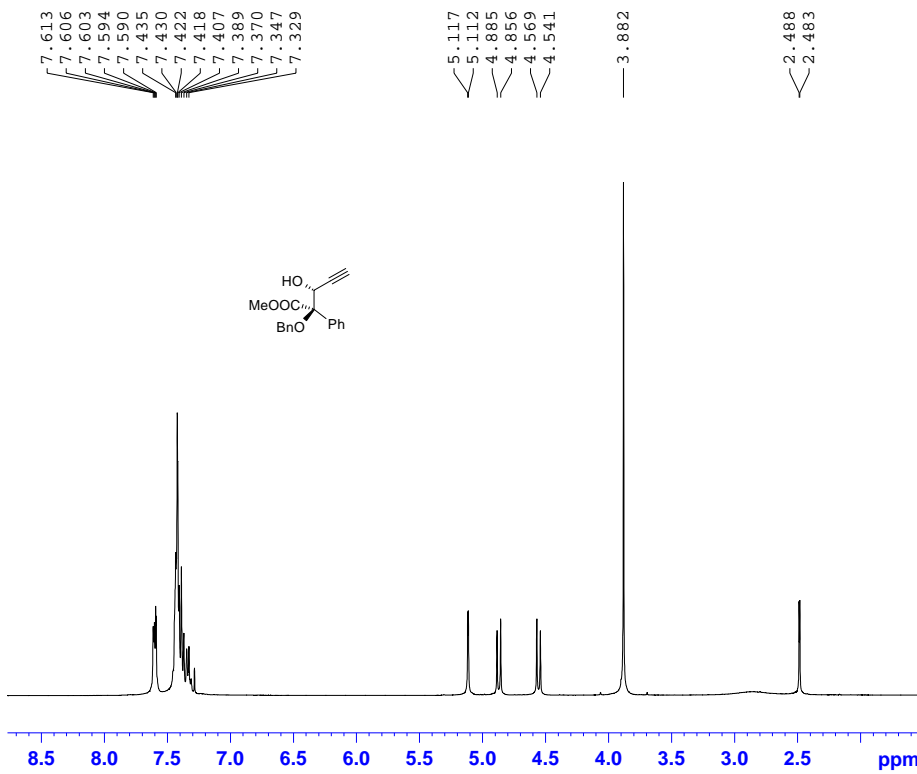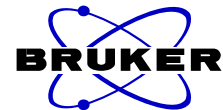

```

NAME      NHB1-2005005-147-2
EXPNO    1
PROCNO   1
Date_    20101029
Time     16.40
INSTRUM  spect
PROBHD   5 mm PABBO BB-
PULPROG  zg30
TD       65536
SOLVENT  CDCl3
NS       16
DS       2
SWH      8278.146 Hz
FIDRES   0.126314 Hz
AQ       3.9584243 sec
RG       90.5
DW       60.400 usec
DE       6.50 usec
TE       299.0 K
D1       1.00000000 sec
TD0      1
  
```

```

===== CHANNEL f1 =====
NUC1     1H
P1       14.50 usec
PL1      -4.00 dB
PL1W    20.75849724 W
SFO1    400.1124708 MHz
SI       32768
SF       400.1100000 MHz
WDW      EM
SSB      0
LB       0.30 Hz
GB       0
PC       1.00
  
```

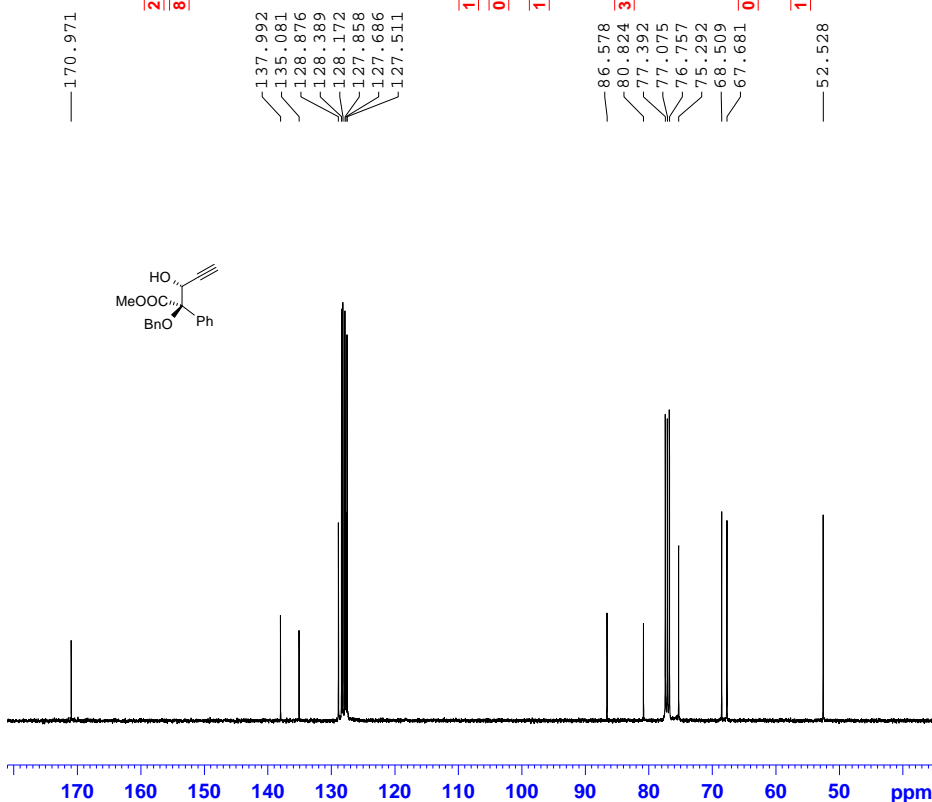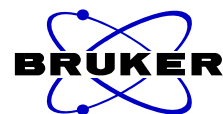

```

NAME      NHB1-2005005-147-2
EXPNO    2
PROCNO   1
Date_    20101029
Time     21.13
INSTRUM  spect
PROBHD   5 mm PABBO BB-
PULPROG  zgpg30
TD       65536
SOLVENT  CDCl3
NS       1024
DS       4
SWH      23980.814 Hz
FIDRES   0.365918 Hz
AQ       1.3664756 sec
RG       32768
DW       20.850 usec
DE       6.50 usec
TE       299.1 K
D1       2.00000000 sec
D11      0.03000000 sec
TD0      1
  
```

```

===== CHANNEL f1 =====
NUC1     13C
P1       9.20 usec
PL1      -2.00 dB
PL1W    61.30850601 W
SFO1    100.6178003 MHz
  
```

```

===== CHANNEL f2 =====
CPDPRG2  waltz16
NUC2     1H
PCPD2    80.00 usec
PL2      -4.00 dB
PL12     10.83 dB
PL13     10.83 dB
PL2W    20.75849724 W
PL12W   0.68264657 W
PL13W   0.68264657 W
SFO2    400.1116004 MHz
SI       32768
SF       100.6077400 MHz
WDW      EM
SSB      0
LB       1.00 Hz
GB       0
PC       1.40
  
```

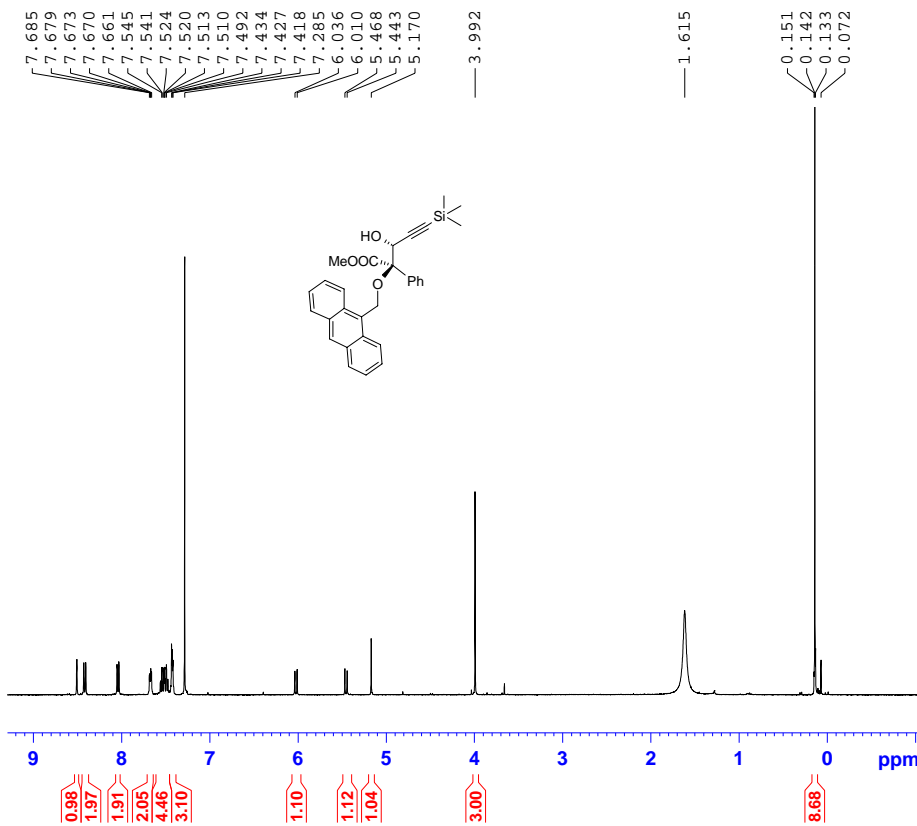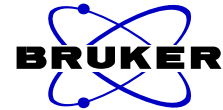

NAME NHB1-2005005-151-02  
EXPNO 1  
PROCNO 1  
Date\_ 20100929  
Time 14.57  
INSTRUM spect  
PROBHD 5 mm PABBO BB-  
PULPROG zg30  
TD 65536  
SOLVENT CDCl3  
NS 16  
DS 2  
SWH 8278.146 Hz  
FIDRES 0.126314 Hz  
AQ 3.9584243 sec  
RG 456.1  
DW 60.400 usec  
DE 6.50 usec  
TE 296.7 K  
D1 1.00000000 sec  
TD0 1

===== CHANNEL f1 =====  
NUC1 1H  
P1 13.50 usec  
PL1 -1.00 dB  
PL1W 10.40389347 W  
SFO1 400.1124708 MHz  
SI 32768  
SF 400.1100000 MHz  
WDW EM  
SSB 0  
LB 0.30 Hz  
GB 0  
PC 1.00

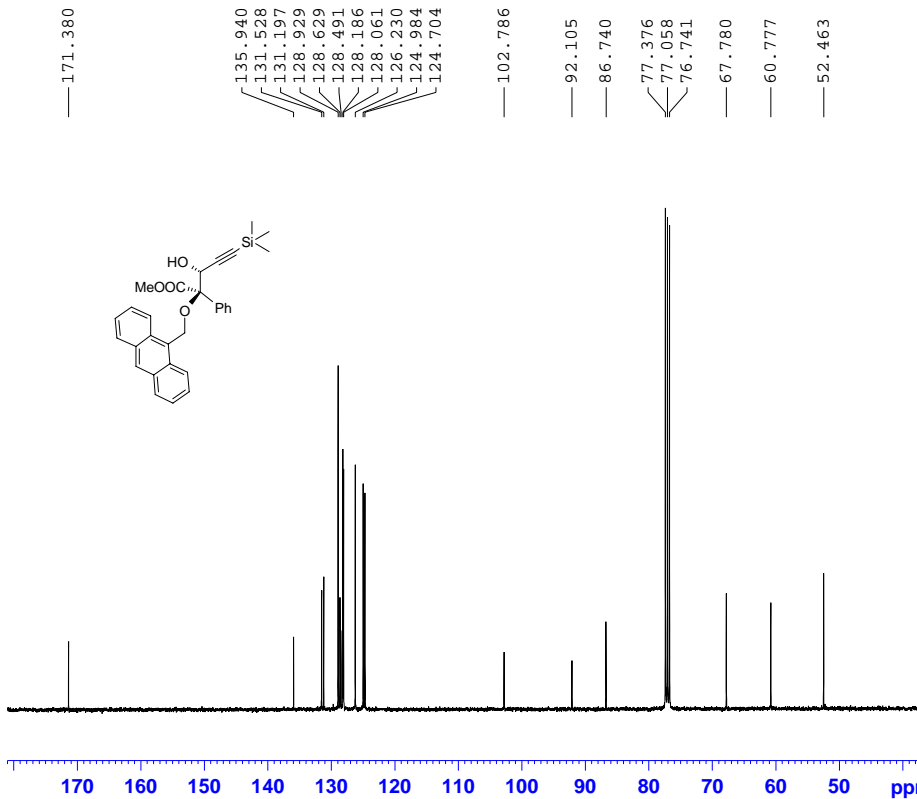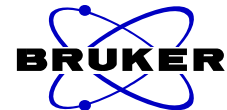

NAME NHB1-2005005-151-02  
EXPNO 2  
PROCNO 1  
Date\_ 20100929  
Time 20.08  
INSTRUM spect  
PROBHD 5 mm PABBO BB-  
PULPROG zgpg30  
TD 65536  
SOLVENT CDCl3  
NS 1024  
DS 4  
SWH 23980.814 Hz  
FIDRES 0.365918 Hz  
AQ 1.3664756 sec  
RG 5792.6  
DW 20.850 usec  
DE 6.50 usec  
TE 297.7 K  
D1 2.00000000 sec  
D11 0.03000000 sec  
TD0 1

===== CHANNEL f1 =====  
NUC1 13C  
P1 9.20 usec  
PL1 -2.00 dB  
PL1W 61.30850601 W  
SFO1 100.6178003 MHz

===== CHANNEL f2 =====  
CPDPRG2 waltz16  
NUC2 1H  
PCPD2 80.00 usec  
PL2 -1.00 dB  
PL12 14.46 dB  
PL13 14.00 dB  
PL2W 10.40389347 W  
PL12W 0.29593471 W  
PL13W 0.32900000 W  
SFO2 400.1116004 MHz  
SI 32768  
SF 100.6077400 MHz  
WDW EM  
SSB 0  
LB 1.00 Hz  
GB 0  
PC 1.40

7.431  
7.427  
7.416  
7.412  
7.404  
7.400  
7.395  
7.387  
7.381  
7.358  
7.354  
7.338  
7.333  
7.320  
7.285

5.354  
4.931  
4.902  
4.669  
4.640  
3.925  
3.903

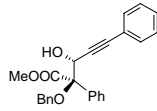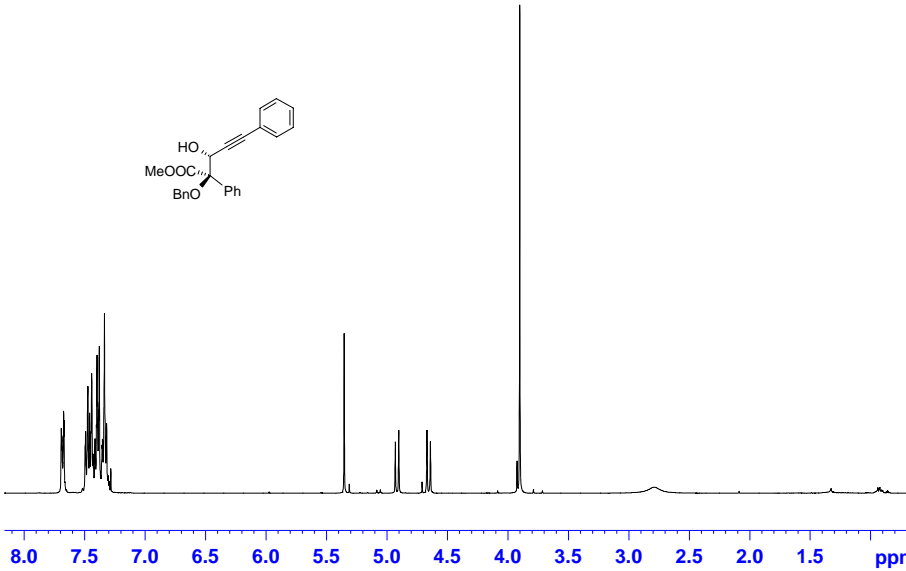

171.161

138.123  
135.393  
131.714  
128.797  
128.557  
128.410  
128.293  
128.267  
128.093  
127.940  
127.669  
127.503  
122.477

87.043  
86.940  
86.397  
77.432  
77.114  
76.796  
68.522  
68.266

52.565

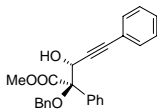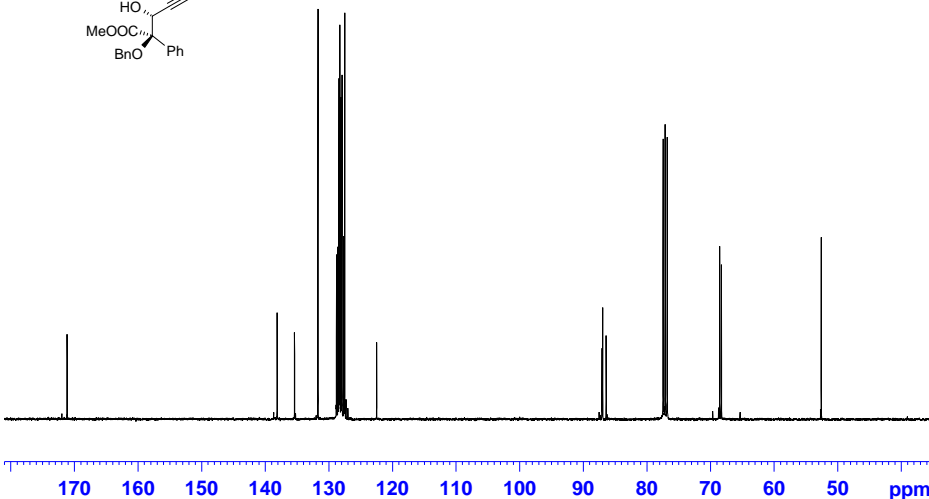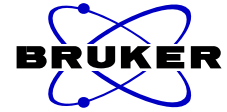

NAME NHB1-2005252-146-1  
EXPNO 1  
PROCNO 1  
Date\_ 20101129  
Time 14.17  
INSTRUM spect  
PROBHD 5 mm PABBO BB-  
PULPROG zg30  
TD 65536  
SOLVENT CDCl3  
NS 16  
DS 2  
SWH 8278.146 Hz  
FIDRES 0.126314 Hz  
AQ 3.9584243 sec  
RG 40.3  
DW 60.400 usec  
DE 6.50 usec  
TE 297.0 K  
D1 1.0000000 sec  
TD0 1

===== CHANNEL f1 =====  
NUC1 1H  
P1 13.70 usec  
PL1 -1.00 dB  
PL1W 10.40389347 W  
SFO1 400.1124708 MHz  
SI 32768  
SF 400.1100000 MHz  
WDW EM  
SSB 0  
LB 0.30 Hz  
GB 0  
PC 1.00

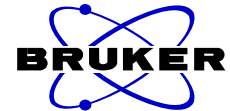

NAME NHB1-2005252-146-1  
EXPNO 2  
PROCNO 1  
Date\_ 20101129  
Time 15.18  
INSTRUM spect  
PROBHD 5 mm PABBO BB-  
PULPROG zgpg30  
TD 65536  
SOLVENT CDCl3  
NS 1024  
DS 4  
SWH 23980.814 Hz  
FIDRES 0.365918 Hz  
AQ 1.3664756 sec  
RG 32768  
DW 20.850 usec  
DE 6.50 usec  
TE 298.2 K  
D1 2.0000000 sec  
D11 0.03000000 sec  
TD0 1

===== CHANNEL f1 =====  
NUC1 13C  
P1 9.20 usec  
PL1 -2.00 dB  
PL1W 61.30850601 W  
SFO1 100.6178003 MHz

===== CHANNEL f2 =====  
CFDPRG2 waltz16  
NUC2 1H  
PCPD2 80.00 usec  
PL2 -1.00 dB  
PL12 14.33 dB  
PL13 14.00 dB  
PL2W 10.40389347 W  
PL12W 0.30492702 W  
PL13W 0.32900000 W  
SFO2 400.1116004 MHz  
SI 32768  
SF 100.6077400 MHz  
WDW EM  
SSB 0  
LB 1.00 Hz  
GB 0  
PC 1.40

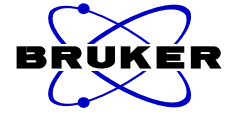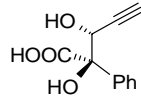

7.608  
7.605  
7.587  
7.344  
7.326  
7.307  
7.279  
7.261  
4.885  
4.880  
3.244  
3.239  
2.513  
2.509  
2.505

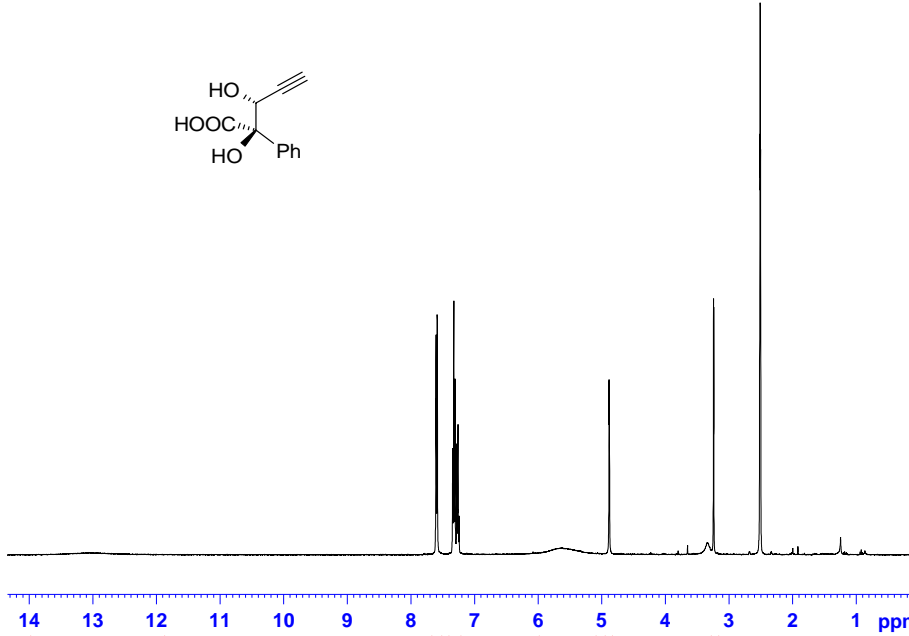

```
NAME      NHB1-2005252-162-1
EXPNO     1
PROCNO    1
Date_     20101106
Time      1.07
INSTRUM   spect
PROBHD    5 mm PABBO BB-
PULPROG   zg30
TD         65536
SOLVENT   DMSO
NS         16
DS         2
SWH        8278.146 Hz
FIDRES     0.126314 Hz
AQ         3.9584243 sec
RG         574.7
DW         60.400 usec
DE         6.50 usec
TE         297.3 K
D1         1.00000000 sec
TD0        1
===== CHANNEL f1 =====
NUC1      1H
P1        14.50 usec
PL1       -4.00 dB
PL1W      20.75849724 W
SFO1      400.1124708 MHz
SI        32768
SF        400.1100000 MHz
WDW       EM
SSB       0
LB        0.30 Hz
GB        0
PC        1.00
```

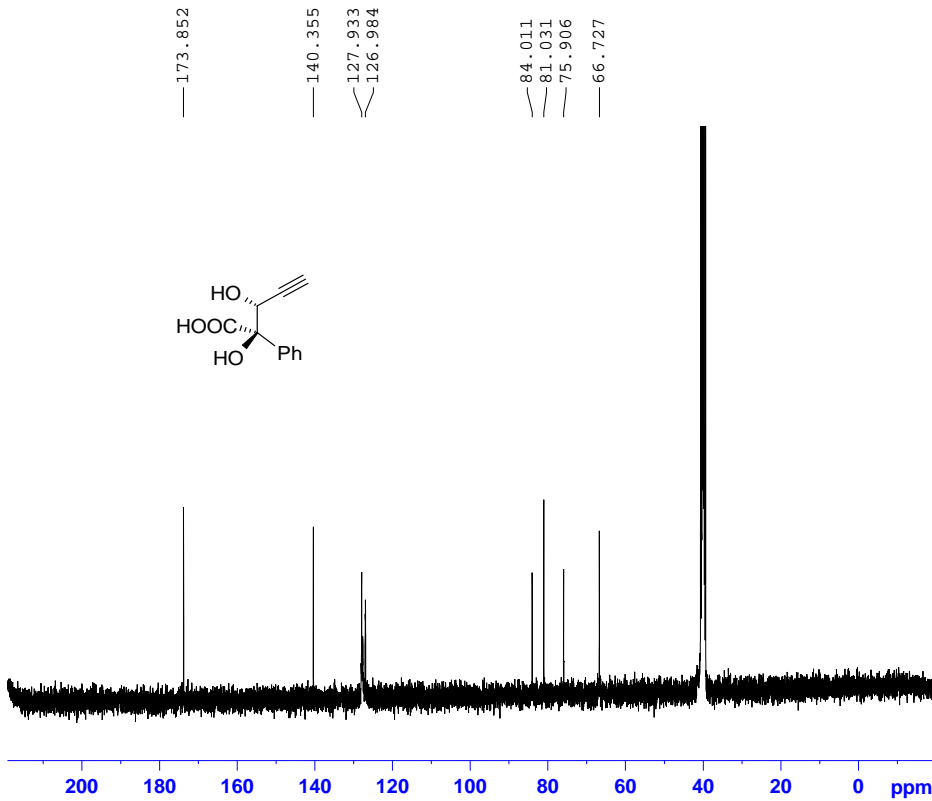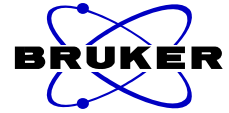

```

NAME      NHB1-2005252-162-1
EXPNO     2
PROCNO    1
Date_     20101106
Time      2.07
INSTRUM   spect
PROBHD    5 mm PABBO BB-
PULPROG   zgpg30
TD         65536
SOLVENT   DMSO
NS         1024
DS         4
SWH       23980.814 Hz
FIDRES    0.365918 Hz
AQ        1.3664756 sec
RG         5160.6
DW         20.850 usec
DE         6.50 usec
TE         297.3 K
D1         2.00000000 sec
D11        0.03000000 sec
TD0        1
  
```

```

===== CHANNEL f1 =====
NUC1      13C
P1        9.20 usec
PL1       -2.00 dB
PL1W      61.30850601 W
SFO1      100.6178003 MHz
  
```

```

===== CHANNEL f2 =====
CPDPRG2   waltz16
NUC2       1H
PCPD2     80.00 usec
PL2       -4.00 dB
PL12      10.83 dB
PL13      10.83 dB
PL2W      20.75849724 W
PL12W     0.68264657 W
PL13W     0.68264657 W
SFO2      400.1116004 MHz
SI         32768
SF         100.6077400 MHz
WDW        EM
SSB        0
LB         1.00 Hz
GB         0
PC         1.40
  
```

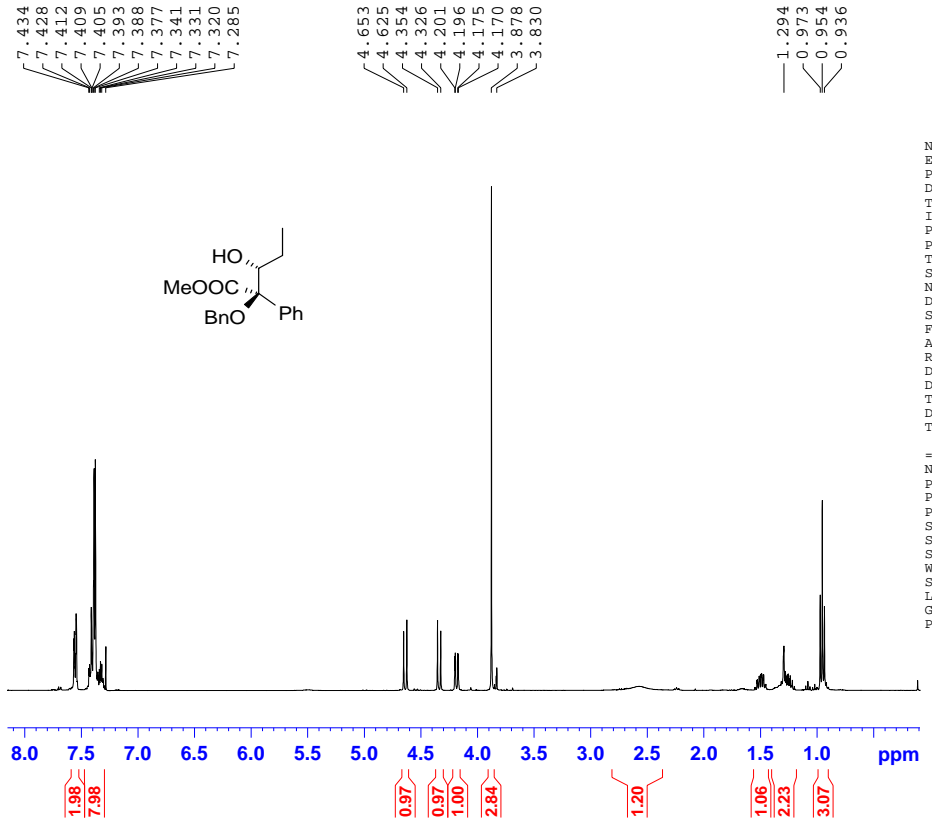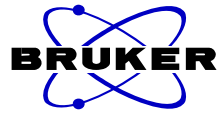

```

NAME      NHB1-2005252-163-1
EXPNO     1
PROCNO    1
Date_     20101103
Time      18.51
INSTRUM   spect
PROBHD    5 mm PABBO BB-
PULPROG   zg30
TD         65536
SOLVENT   CDCl3
NS         16
DS         2
SWH       8278.146 Hz
FIDRES    0.126314 Hz
AQ        3.9584243 sec
RG         90.5
DW         60.400 usec
DE         6.50 usec
TE         298.0 K
D1         1.00000000 sec
TD0        1
  
```

```

===== CHANNEL f1 =====
NUC1      1H
P1        14.50 usec
PL1       -4.00 dB
PL1W      20.75849724 W
SFO1      400.1124708 MHz
SI         32768
SF         400.1100000 MHz
WDW        EM
SSB        0
LB         0.30 Hz
GB         0
PC         1.00
  
```

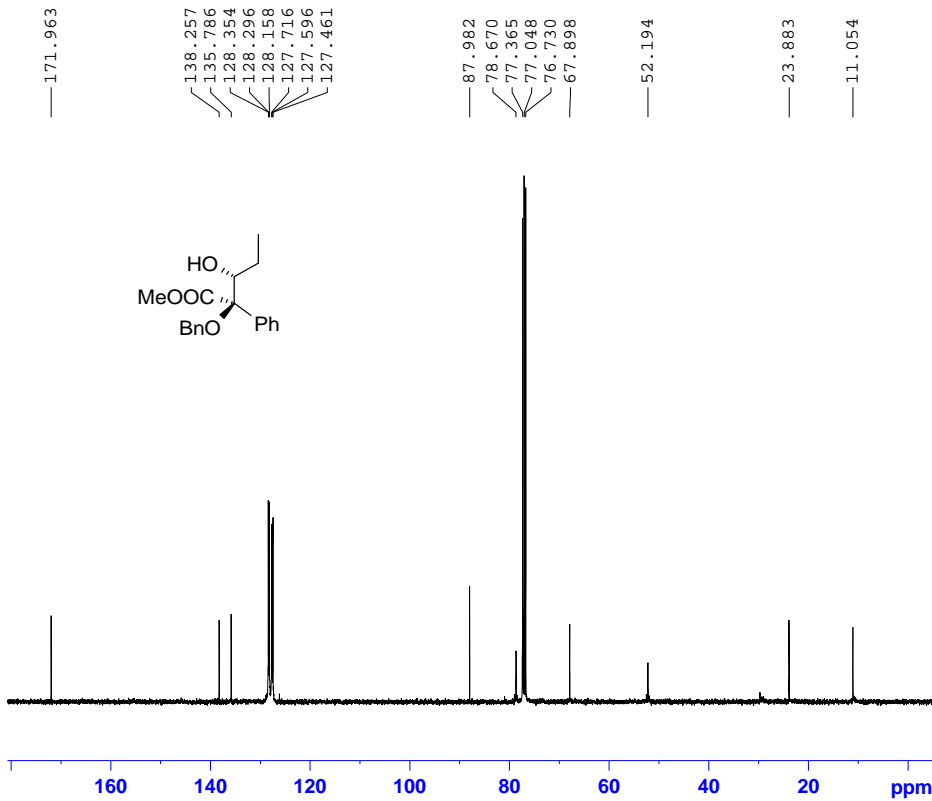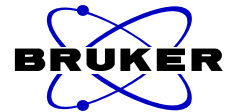

```

NAME      NHBI-2005252-163-1
EXPNO     2
PROCNO    1
Date_     20101104
Time      20.03
INSTRUM   spect
PROBHD    5 mm PABBO BB-
PULPROG   zgpg30
TD        65536
SOLVENT   CDCl3
NS        1024
DS        4
SWH       23980.814 Hz
FIDRES    0.365918 Hz
AQ        1.3664756 sec
RG        11585.2
DW        20.850 usec
DE        6.50 usec
TE        298.7 K
D1        2.0000000 sec
D11       0.0300000 sec
TD0       1

===== CHANNEL f1 =====
NUC1      13C
P1        9.20 usec
PL1       -2.00 dB
PL1W     61.30850601 W
SFO1     100.6178003 MHz

===== CHANNEL f2 =====
CPDPRG2   waltz16
NUC2      1H
PCPD2     80.00 usec
PL2       -4.00 dB
PL12     10.83 dB
PL13     10.83 dB
PL2W     20.75849724 W
PL12W    0.68264657 W
PL13W    0.68264657 W
SFO2     400.1116004 MHz
SI        32768
SF       100.6077400 MHz
WDW       EM
SSB       0
LB        1.00 Hz
GB        0
PC        1.40
  
```

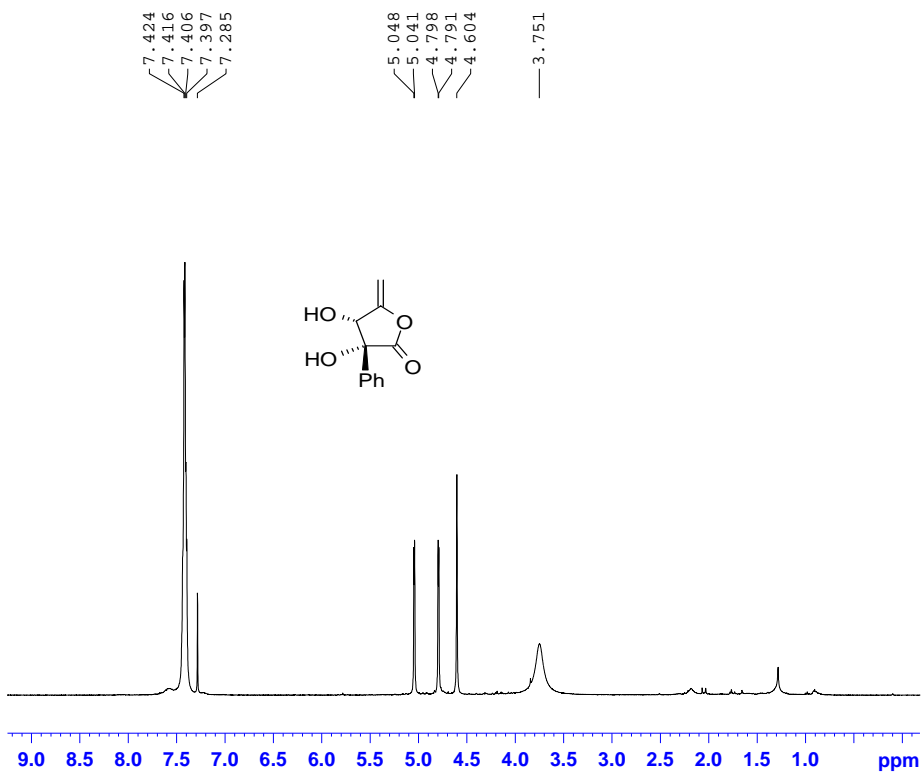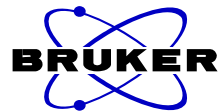

```

NAME      NHBI-2005252-164-1
EXPNO     4
PROCNO    1
Date_     20101105
Time      13.58
INSTRUM   spect
PROBHD    5 mm PABBO BB-
PULPROG   zg30
TD        65536
SOLVENT   CDCl3
NS        16
DS        2
SWH       8278.146 Hz
FIDRES    0.126314 Hz
AQ        3.9584243 sec
RG        256
DW        60.400 usec
DE        6.50 usec
TE        298.0 K
D1        1.0000000 sec
TD0       1

===== CHANNEL f1 =====
NUC1      1H
P1        14.50 usec
PL1       -4.00 dB
PL1W     20.75849724 W
SFO1     400.1124708 MHz
SI        32768
SF       400.1100000 MHz
WDW       EM
SSB       0
LB        0.30 Hz
GB        0
PC        1.00
  
```

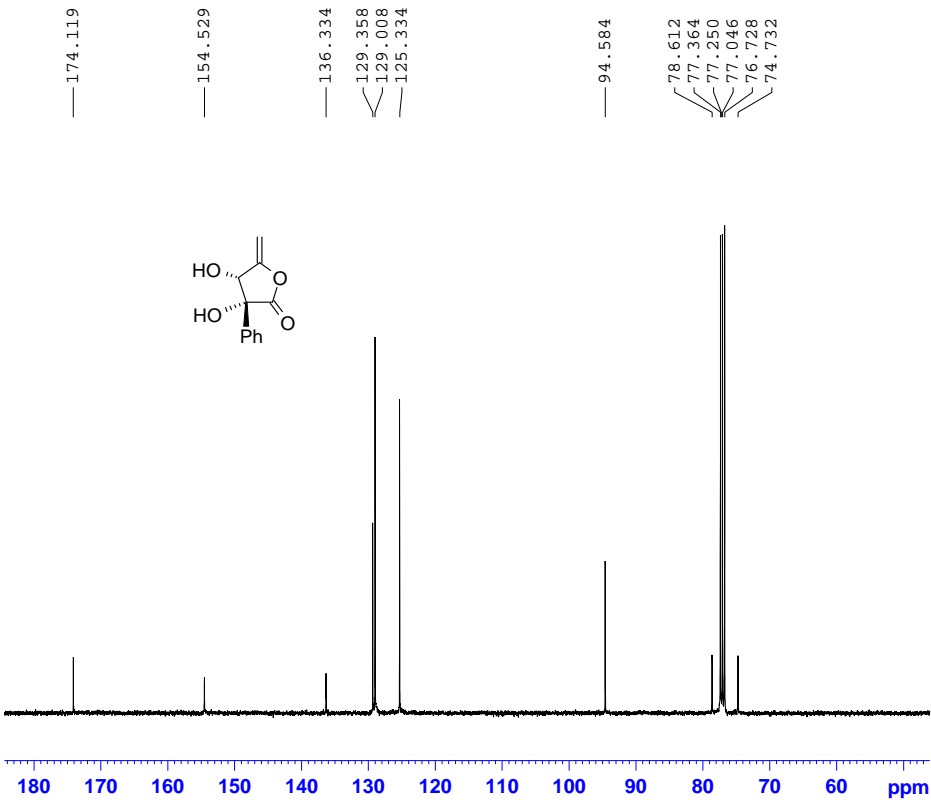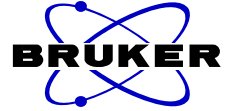

```

NAME      NHB1-2005252-164-1
EXPNO    1
PROCNO   1
Date_    20101104
Time     16.07
INSTRUM  spect
PROBHD   5 mm PABBO BB-
PULPROG  zgpg30
TD       65536
SOLVENT  CDCl3
NS       1024
DS       4
SWH      23980.814 Hz
FIDRES   0.365918 Hz
AQ       1.3664756 sec
RG       32768
DW       20.850 usec
DE       6.50 usec
TE       298.8 K
D1       2.00000000 sec
D11      0.03000000 sec
TD0      1

===== CHANNEL f1 =====
NUC1     13C
P1       9.20 usec
PL1     -2.00 dB
PL1W    61.30850601 W
SFO1    100.6178003 MHz

===== CHANNEL f2 =====
CPDPRG2  waltz16
NUC2     1H
PCPD2    80.00 usec
PL2     -4.00 dB
PL12    10.83 dB
PL13    10.83 dB
PL2W    20.75849724 W
PL12W   0.68264657 W
PL13W   0.68264657 W
SFO2    400.1116004 MHz
SI      32768
SF      100.6077400 MHz
WDW     EM
SSB     0
LB      1.00 Hz
GB      0
PC      1.40
  
```

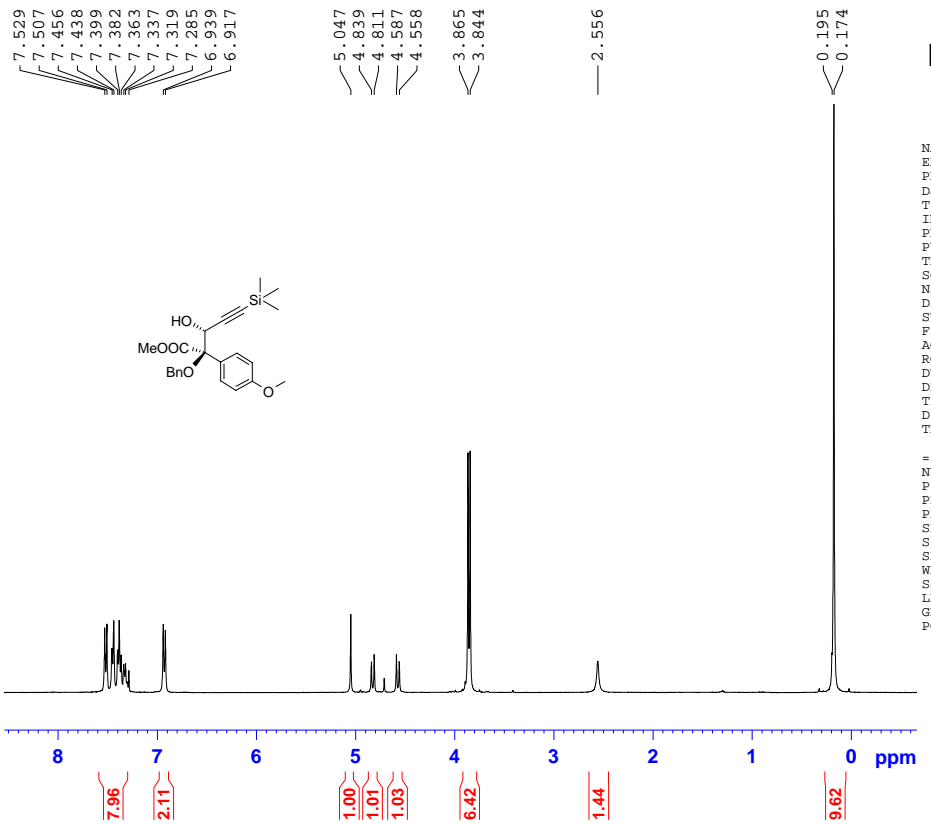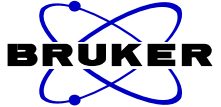

```

NAME      NHB1-2005252-166-1
EXPNO    1
PROCNO   1
Date_    20101105
Time     21.50
INSTRUM  spect
PROBHD   5 mm PABBO BB-
PULPROG  zg30
TD       65536
SOLVENT  CDCl3
NS       16
DS       2
SWH      8278.146 Hz
FIDRES   0.126314 Hz
AQ       3.9584243 sec
RG       128
DW       60.400 usec
DE       6.50 usec
TE       297.7 K
D1       1.00000000 sec
TD0      1

===== CHANNEL f1 =====
NUC1     1H
P1       14.50 usec
PL1     -4.00 dB
PL1W    20.75849724 W
SFO1    400.1124708 MHz
SI      32768
SF      400.1100000 MHz
WDW     EM
SSB     0
LB      0.30 Hz
GB      0
PC      1.00
  
```

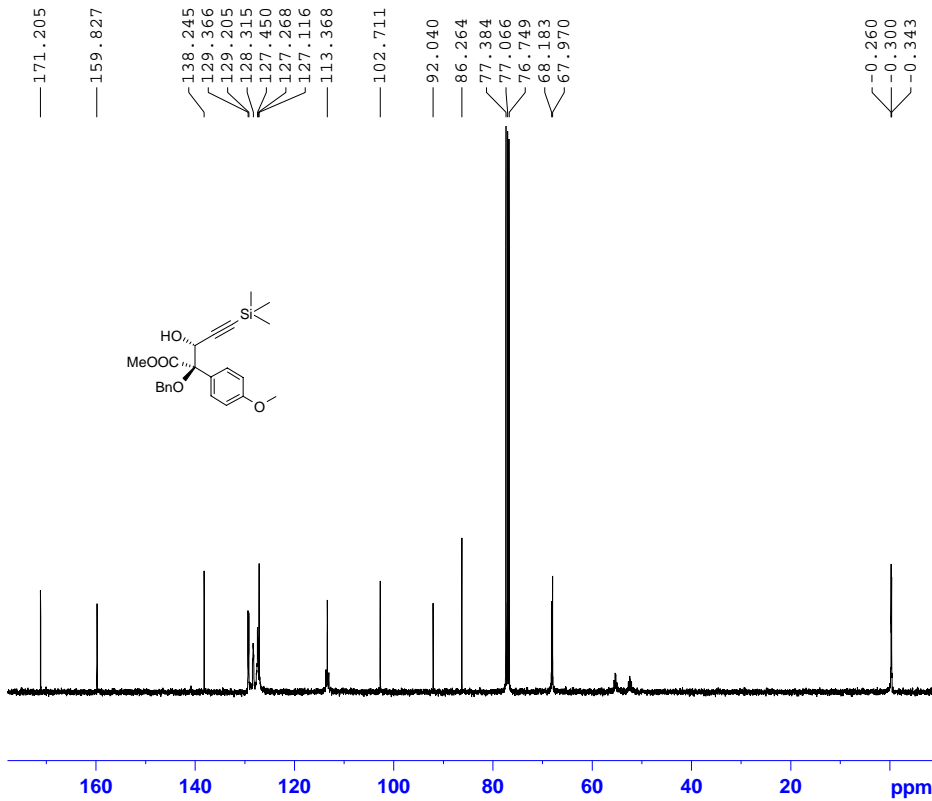

NAME NHB1-2005252-166-1  
EXPNO 2  
PROCNO 1  
Date\_ 20101105  
Time 22.49  
INSTRUM spect  
PROBHD 5 mm PABBO BB-  
PULPROG zgpg30  
TD 65536  
SOLVENT CDCl3  
NS 1024  
DS 4  
SWH 23980.814 Hz  
FIDRES 0.365918 Hz  
AQ 1.3664756 sec  
RG 32768  
DW 20.850 usec  
DE 6.50 usec  
TE 297.7 K  
D1 2.00000000 sec  
D11 0.03000000 sec  
TD0 1

===== CHANNEL f1 =====  
NUC1 13C  
P1 9.20 usec  
PL1 -2.00 dB  
PL1W 61.30850601 W  
SFO1 100.6178003 MHz

===== CHANNEL f2 =====  
CPDPRG2 waltz16  
NUC2 1H  
PCPD2 80.00 usec  
PL2 -4.00 dB  
PL12 10.83 dB  
PL13 10.83 dB  
PL2W 20.75849724 W  
PL12W 0.68264657 W  
PL13W 0.68264657 W  
SFO2 400.1116004 MHz  
SI 32768  
SF 100.6077400 MHz  
WDW EM  
SSB 0  
LB 1.00 Hz  
GB 0  
PC 1.40

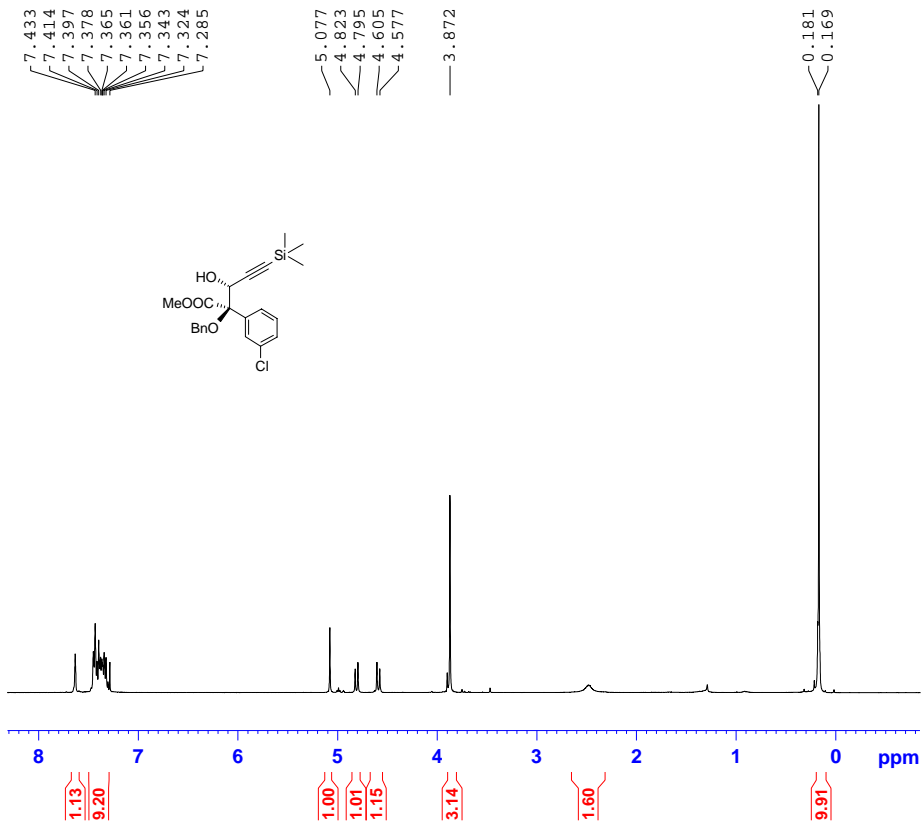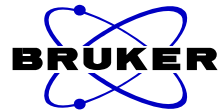

NAME NHB1-2005252-167-1  
EXPNO 1  
PROCNO 1  
Date\_ 20101105  
Time 22.56  
INSTRUM spect  
PROBHD 5 mm PABBO BB-  
PULPROG zg30  
TD 65536  
SOLVENT CDCl3  
NS 16  
DS 2  
SWH 8278.146 Hz  
FIDRES 0.126314 Hz  
AQ 3.9584243 sec  
RG 256  
DW 60.400 usec  
DE 6.50 usec  
TE 297.6 K  
D1 1.00000000 sec  
TD0 1

===== CHANNEL f1 =====  
NUC1 1H  
P1 14.50 usec  
PL1 -4.00 dB  
PL1W 20.75849724 W  
SFO1 400.1124708 MHz  
SI 32768  
SF 400.1100000 MHz  
WDW EM  
SSB 0  
LB 0.30 Hz  
GB 0  
PC 1.00



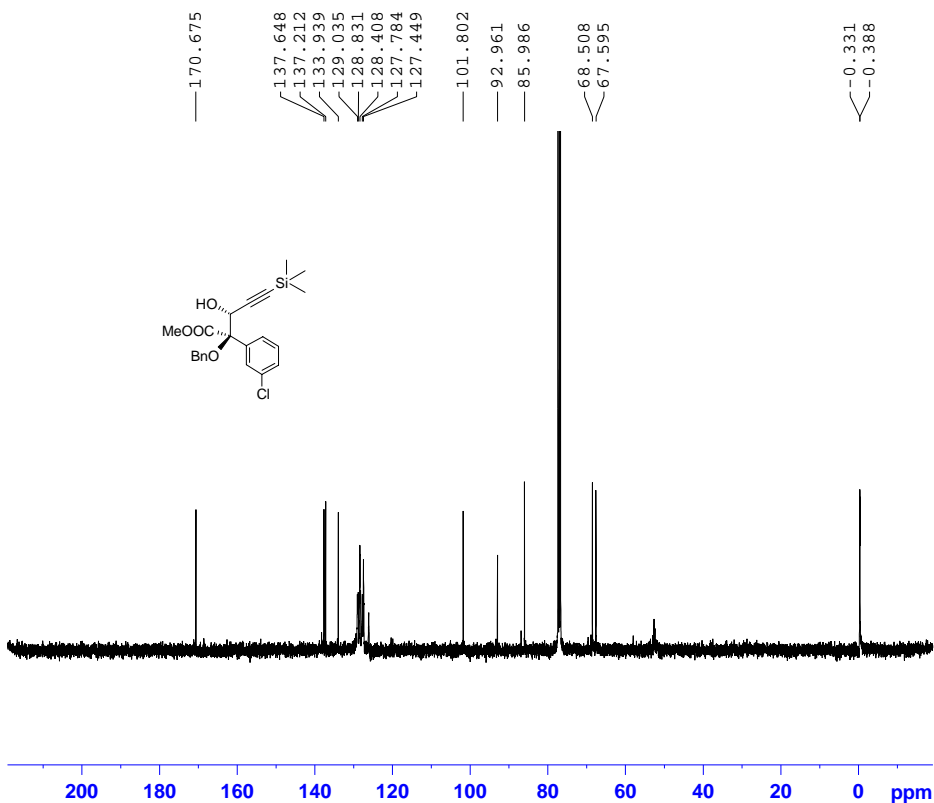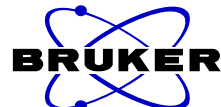

```

NAME      NH1-2005252-167-1
EXPNO    2
PROCNO    1
Date_    20101105
Time     23.56
INSTRUM   spect
PROBHD    5 mm PABBO BB-
PULPROG   zgpg30
TD        65536
SOLVENT   CDCl3
NS        1024
DS        4
SWH       23980.814 Hz
FIDRES    0.365918 Hz
AQ        1.3664756 sec
RG        8192
DW        20.850 usec
DE        6.50 usec
TE        297.6 K
D1        2.00000000 sec
D11       0.03000000 sec
TDO       1

===== CHANNEL f1 =====
NUC1      13C
P1        9.20 usec
PL1       -2.00 dB
PL1W     61.30850601 W
SFO1     100.6178003 MHz

===== CHANNEL f2 =====
CPDPRG2   waltz16
NUC2      1H
PCPD2     80.00 usec
PL2       -4.00 dB
PL12     10.83 dB
PL13     10.83 dB
PL2W     20.75849724 W
PL12W    0.68264657 W
PL13W    0.68264657 W
SFO2     400.1116004 MHz
SI        32768
SF        100.6077400 MHz
WDW       EM
SSB       0
LB        1.00 Hz
GB        0
PC        1.40
  
```

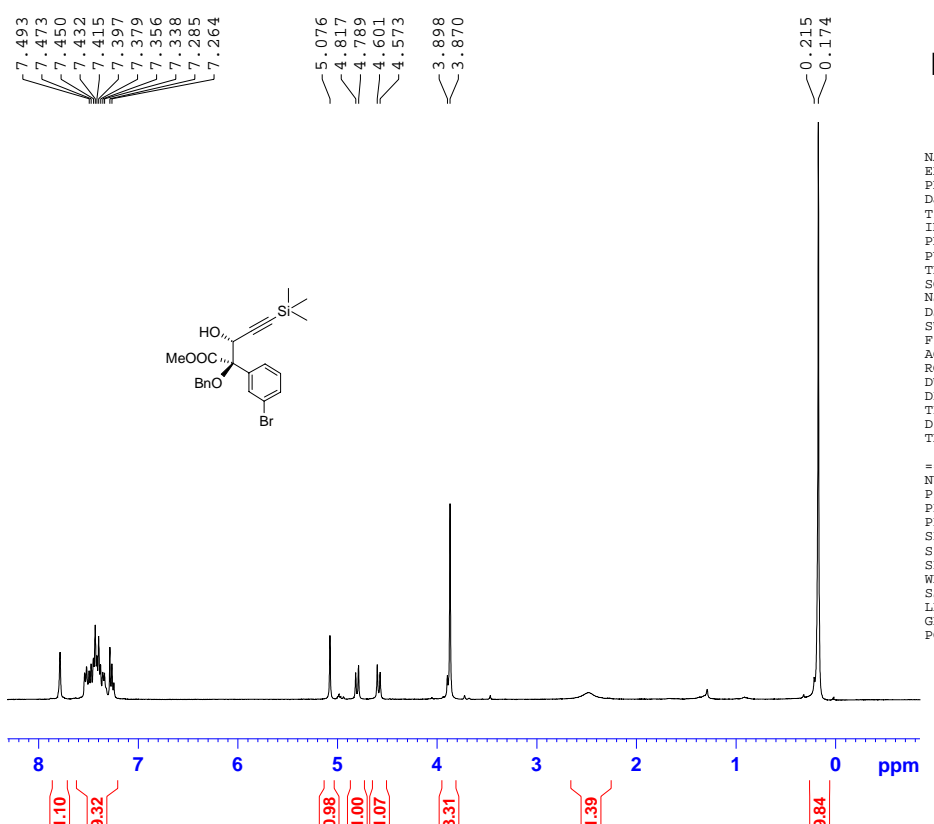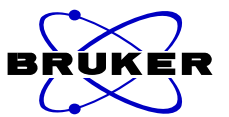

```

NAME      NH1-2005252-168-1
EXPNO    1
PROCNO    1
Date_    20101106
Time     0.02
INSTRUM   spect
PROBHD    5 mm PABBO BB-
PULPROG   zg30
TD        65536
SOLVENT   CDCl3
NS        16
DS        2
SWH       8278.146 Hz
FIDRES    0.126314 Hz
AQ        3.9584243 sec
RG        181
DW        60.400 usec
DE        6.50 usec
TE        297.4 K
D1        1.00000000 sec
TDO       1

===== CHANNEL f1 =====
NUC1      1H
P1        14.50 usec
PL1       -4.00 dB
PL1W     20.75849724 W
SFO1     400.1124708 MHz
SI        32768
SF        400.1100000 MHz
WDW       EM
SSB       0
LB        0.30 Hz
GB        0
PC        1.00
  
```

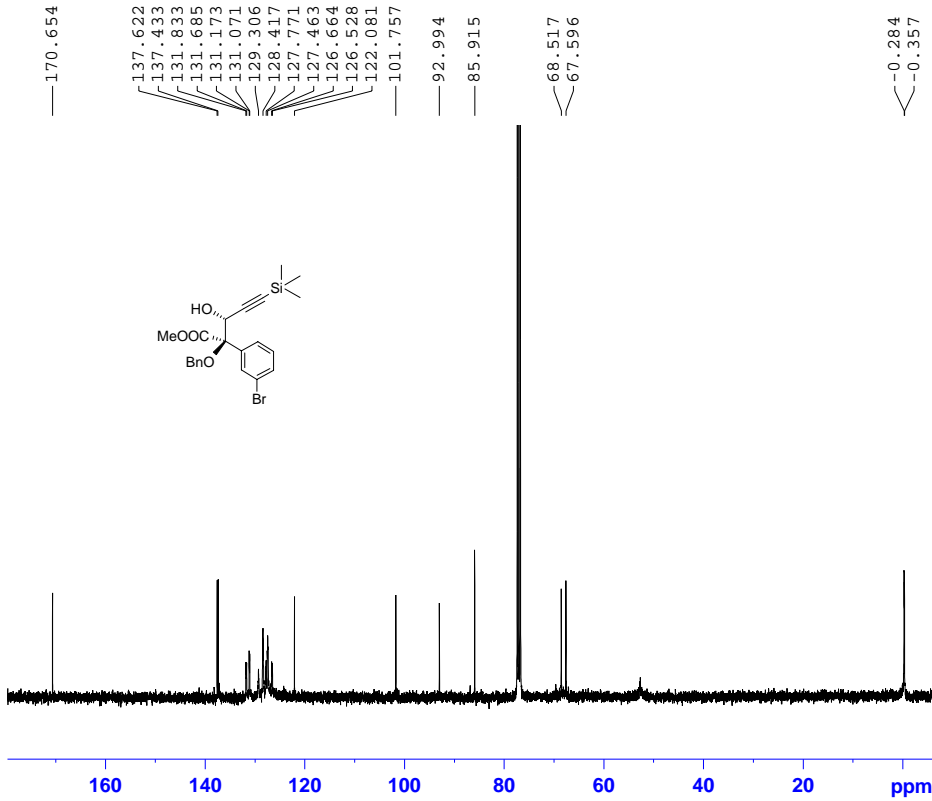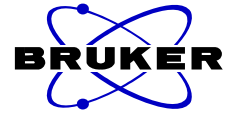

NAME NHB1-2005252-168-1  
 EXPNO 2  
 PROCNO 1  
 Date\_ 20101106  
 Time 1.02  
 INSTRUM spect  
 PROBHD 5 mm PABBO BB-  
 PULPROG zgpg30  
 TD 65536  
 SOLVENT CDCl3  
 NS 1024  
 DS 4  
 SWH 23980.814 Hz  
 FIDRES 0.365918 Hz  
 AQ 1.3664756 sec  
 RG 9195.2  
 DW 20.850 usec  
 DE 6.50 usec  
 TE 297.5 K  
 D1 2.00000000 sec  
 D11 0.03000000 sec  
 TD0 1

===== CHANNEL f1 =====  
 NUC1 13C  
 P1 9.20 usec  
 PL1 -2.00 dB  
 PL1W 61.30850601 W  
 SFO1 100.6178003 MHz

===== CHANNEL f2 =====  
 CPDPRG2 waltz16  
 NUC2 1H  
 PCPD2 80.00 usec  
 PL2 -4.00 dB  
 PL12 10.83 dB  
 PL13 10.83 dB  
 PL2W 20.75849724 W  
 PL12W 0.68264657 W  
 PL13W 0.68264657 W  
 SFO2 400.1116004 MHz  
 SI 32768  
 SF 100.6077400 MHz  
 WDW EM  
 SSB 0  
 LB 1.00 Hz  
 GB 0  
 PC 1.40

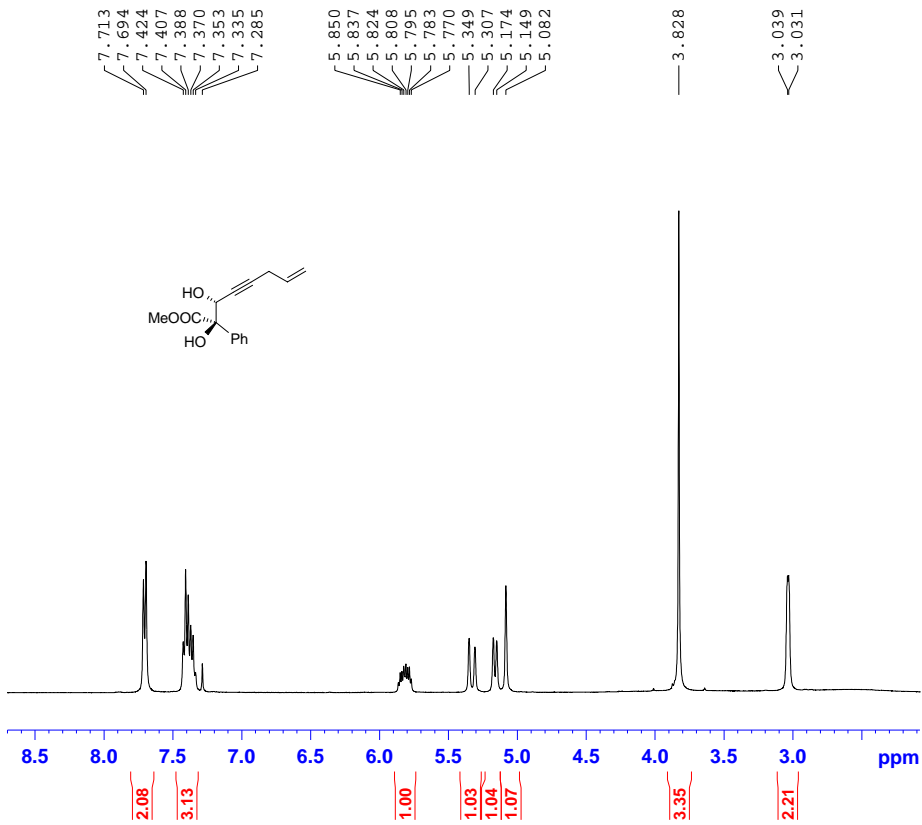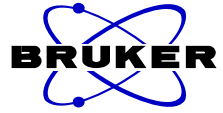

NAME NHB1-2005252-172-1  
 EXPNO 3  
 PROCNO 1  
 Date\_ 20101105  
 Time 14.45  
 INSTRUM spect  
 PROBHD 5 mm PABBO BB-  
 PULPROG zg30  
 TD 65536  
 SOLVENT CDCl3  
 NS 16  
 DS 2  
 SWH 8278.146 Hz  
 FIDRES 0.126314 Hz  
 AQ 3.9584243 sec  
 RG 128  
 DW 60.400 usec  
 DE 6.50 usec  
 TE 298.2 K  
 D1 1.00000000 sec  
 TD0 1

===== CHANNEL f1 =====  
 NUC1 1H  
 P1 14.50 usec  
 PL1 -4.00 dB  
 PL1W 20.75849724 W  
 SFO1 400.1124708 MHz  
 SI 32768  
 SF 400.1100000 MHz  
 WDW EM  
 SSB 0  
 LB 0.30 Hz  
 GB 0  
 PC 1.00

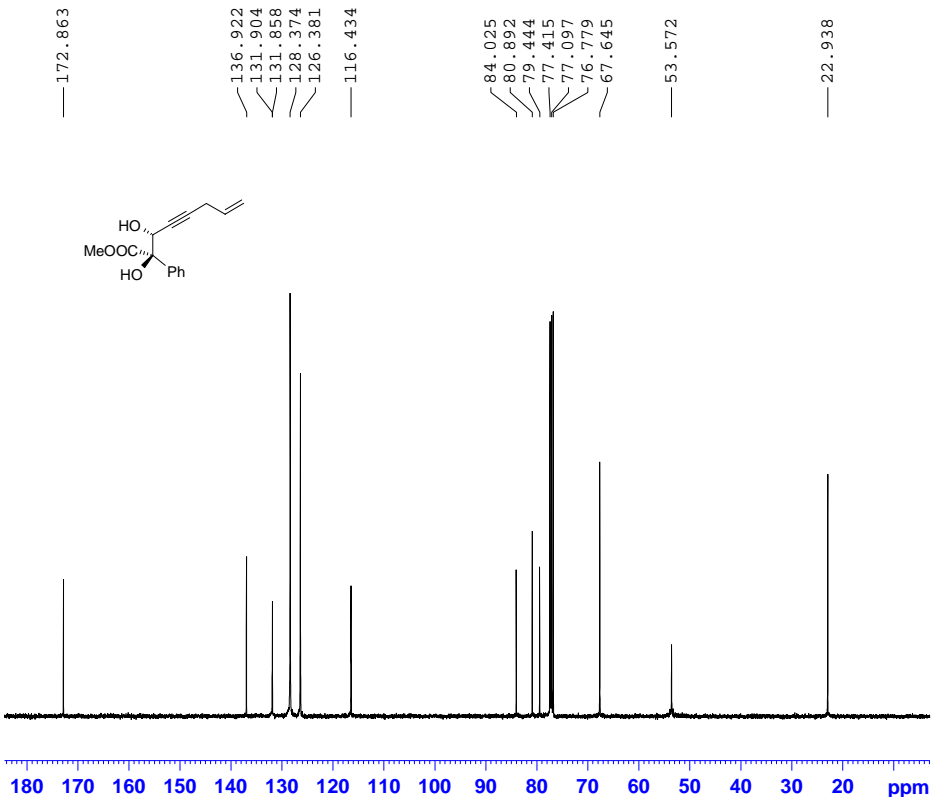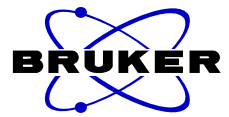

```

NAME      NH1-2005252-172-1
EXPNO    2
PROCNO    1
Date_     20101104
Time      21.11
INSTRUM   spect
PROBHD    5 mm PABBO BB-
PULPROG   zgpg30
TD         65536
SOLVENT   CDCl3
NS         1024
DS         4
SWH        23980.814 Hz
FIDRES     0.365918 Hz
AQ         1.3664756 sec
RG         32768
DW         20.850 usec
DE         6.50 usec
TE         298.5 K
D1         2.00000000 sec
D11        0.03000000 sec
TD0        1

===== CHANNEL f1 =====
NUC1       13C
P1         9.20 usec
PL1        -2.00 dB
PL1W       61.30850601 W
SFO1       100.6178003 MHz

===== CHANNEL f2 =====
CPDPRG2    waltz16
NUC2        1H
PCPD2       80.00 usec
PL2         -4.00 dB
PL12        10.83 dB
PL13        10.83 dB
PL2W        20.75849724 W
PL12W       0.68264657 W
PL13W       0.68264657 W
SFO2       400.1116004 MHz
SI          32768
SF         100.6077400 MHz
WDW         EM
SSB         0
LB          1.00 Hz
GB          0
PC          1.40
  
```

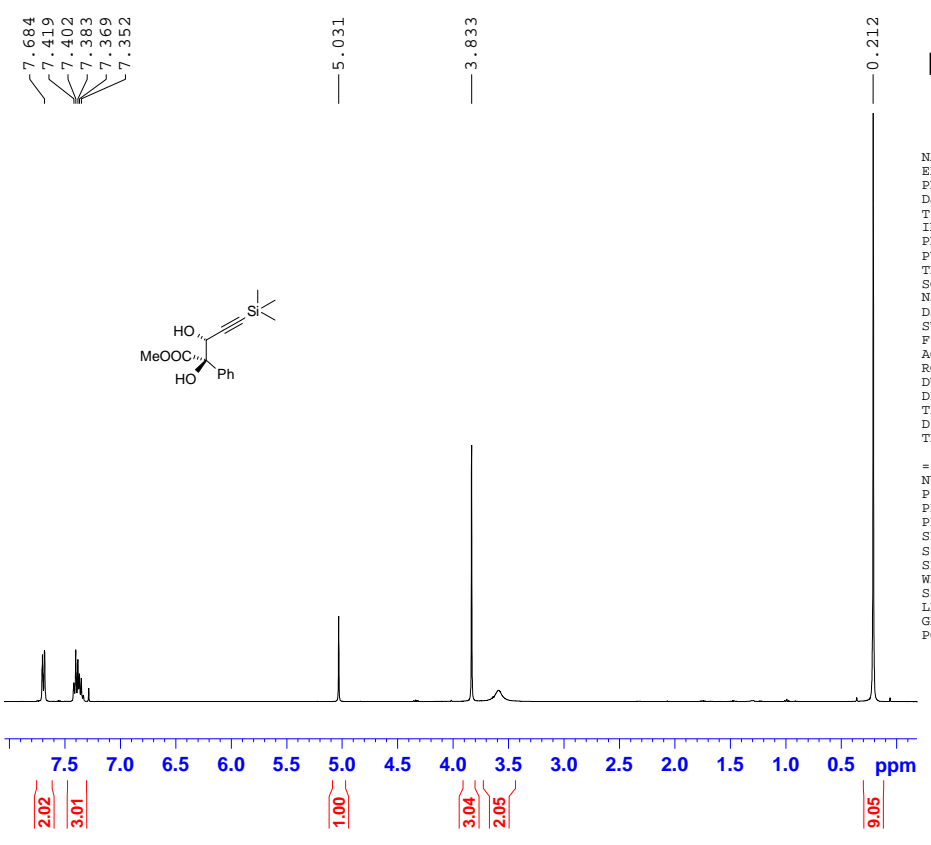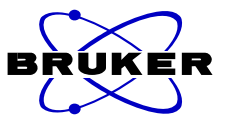

```

NAME      NH1-2005252-178-A
EXPNO    1
PROCNO    1
Date_     20101111
Time      20.01
INSTRUM   spect
PROBHD    5 mm PABBO BB-
PULPROG   zg30
TD         65536
SOLVENT   CDCl3
NS         16
DS         2
SWH        8278.146 Hz
FIDRES     0.126314 Hz
AQ         3.9584243 sec
RG         128
DW         60.400 usec
DE         6.50 usec
TE         299.2 K
D1         1.00000000 sec
TD0        1

===== CHANNEL f1 =====
NUC1       1H
P1         14.50 usec
PL1        -4.00 dB
PL1W       20.75849724 W
SFO1       400.1124708 MHz
SI          32768
SF         400.1100000 MHz
WDW         EM
SSB         0
LB          0.30 Hz
GB          0
PC          1.00
  
```

—172.676  
 —136.578  
 —128.470  
 —128.389  
 —126.370  
 —102.079  
 —91.770  
 —80.803  
 —77.369  
 —77.051  
 —76.734  
 —67.889  
 —53.563  
 —53.521  
 —0.253  
 —0.289

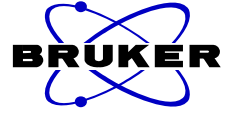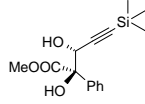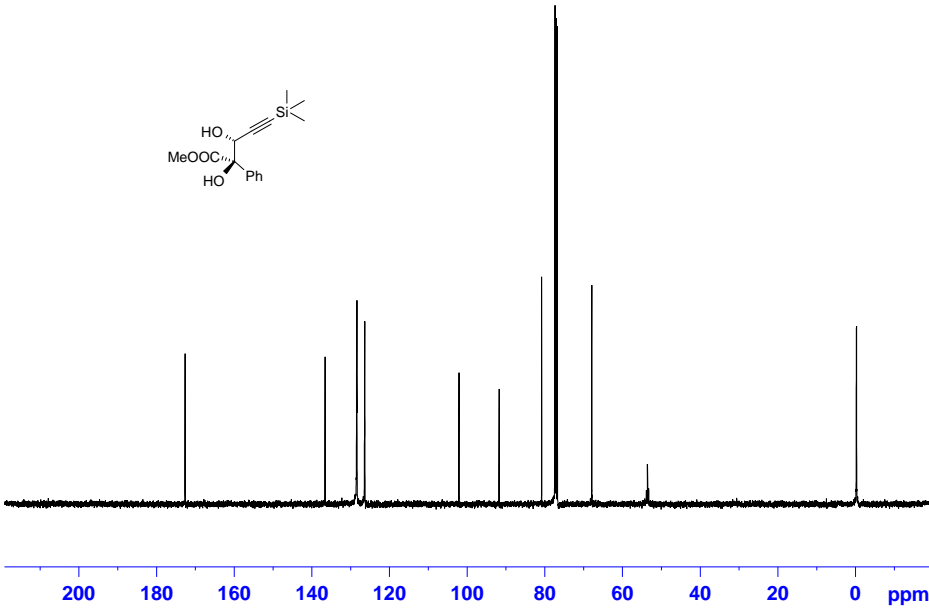

```

NAME      NHB1-2005252-178-A
EXPNO     2
PROCNO    1
Date_     20101111
Time      21.14
INSTRUM   spect
PROBHD    5 mm PABBO BB-
PULPROG   zgpg30
TD        65536
SOLVENT   CDCl3
NS        1024
DS        4
SWH       23980.814 Hz
FIDRES    0.365918 Hz
AQ        1.3664756 sec
RG        9195.2
DW        20.850 usec
DE        6.50 usec
TE        299.4 K
D1        2.0000000 sec
D11       0.0300000 sec
TD0       1
  
```

```

===== CHANNEL f1 =====
NUC1      13C
P1        9.20 usec
PL1       -2.00 dB
PL1W      61.30850601 W
SFO1      100.6178003 MHz
  
```

```

===== CHANNEL f2 =====
CPDPRG2   waltz16
NUC2      1H
PCPD2     80.00 usec
PL2       -4.00 dB
PL12      10.83 dB
PL13      10.83 dB
PL2W      20.75849724 W
PL12W     0.68264657 W
PL13W     0.68264657 W
SFO2      400.1116004 MHz
SI        32768
SF        100.6077400 MHz
WDW       EM
SSB       0
LB        1.00 Hz
GB        0
PC        1.40
  
```

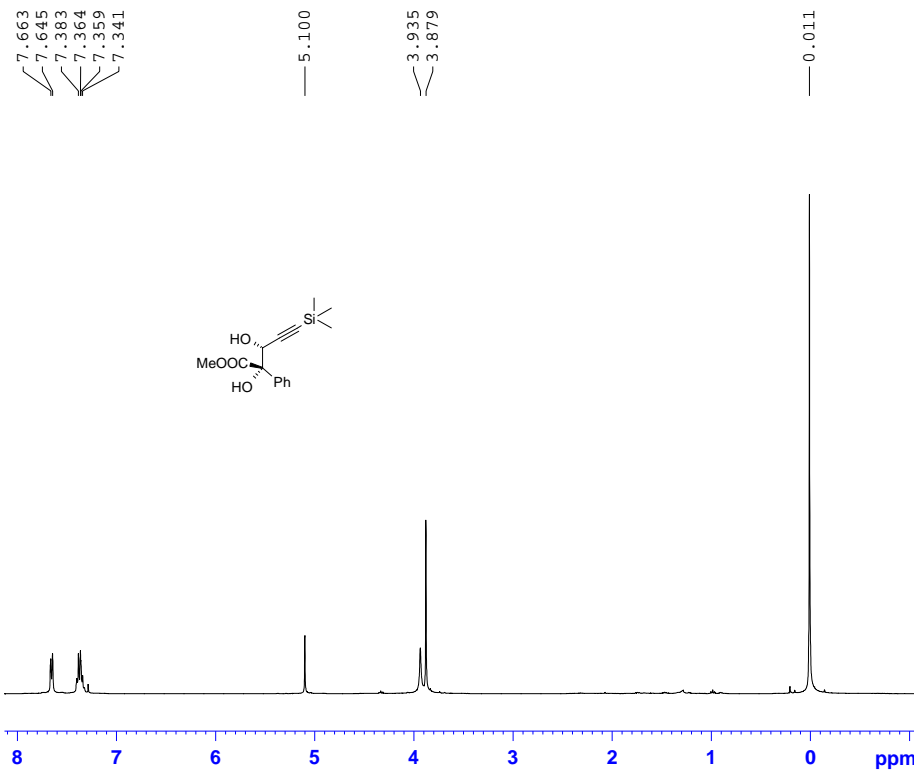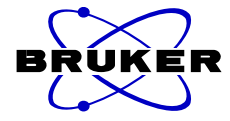

```

NAME      NHBI-2005252-178-B
EXPNO    1
PROCNO    1
Date_     20101111
Time      20.09
INSTRUM   spect
PROBHD    5 mm PABBO BB-
PULPROG   zg30
TD         65536
SOLVENT   CDCl3
NS         16
DS         2
SWH        8278.146 Hz
FIDRES     0.126314 Hz
AQ         3.9584243 sec
RG         90.5
DW         60.400 usec
DE         6.50 usec
TE         299.3 K
D1         1.00000000 sec
TD0        1
  
```

```

===== CHANNEL f1 =====
NUC1      1H
P1        14.50 usec
PL1       -4.00 dB
PL1W      20.75849724 W
SFO1      400.1124708 MHz
SI        32768
SF        400.1100000 MHz
WDW        EM
SSB        0
LB         0.30 Hz
GB         0
PC         1.00
  
```

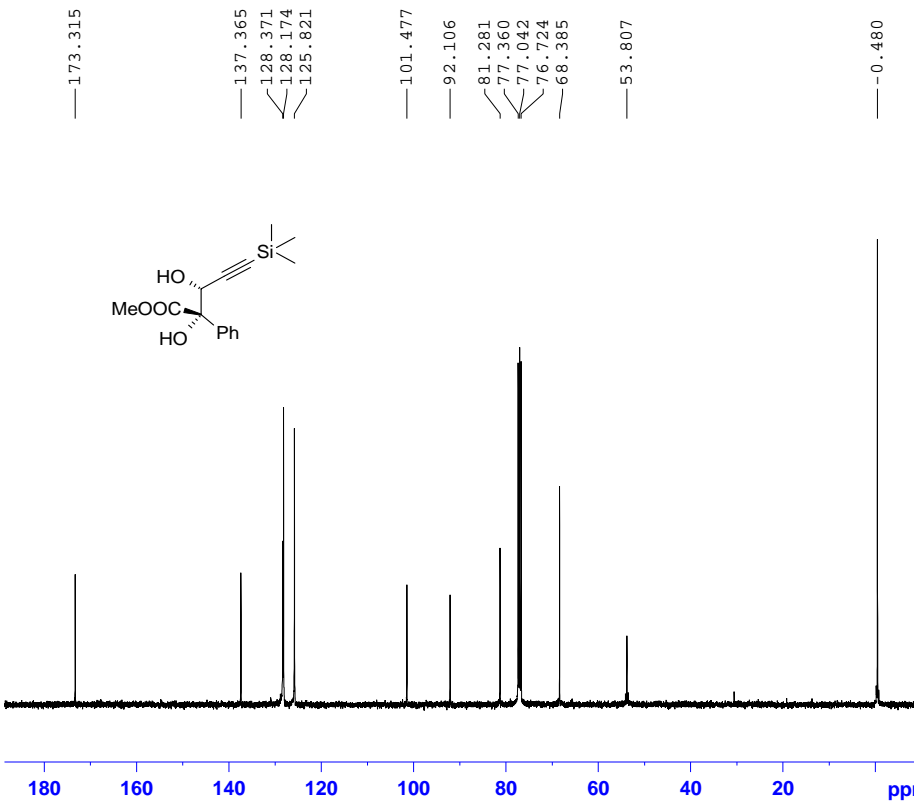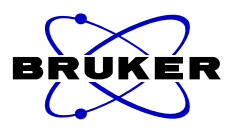

```

NAME      NHBI-2005252-178-B
EXPNO    2
PROCNO    1
Date_     20101111
Time      22.20
INSTRUM   spect
PROBHD    5 mm PABBO BB-
PULPROG   zgpg30
TD         65536
SOLVENT   CDCl3
NS         1024
DS         4
SWH        23980.814 Hz
FIDRES     0.365918 Hz
AQ         1.3664756 sec
RG         9195.2
DW         20.850 usec
DE         6.50 usec
TE         299.9 K
D1         2.00000000 sec
D11        0.03000000 sec
TD0        1
  
```

```

===== CHANNEL f1 =====
NUC1      13C
P1        9.20 usec
PL1       -2.00 dB
PL1W      61.30850601 W
SFO1      100.6178003 MHz

===== CHANNEL f2 =====
CPDPRG2   waltz16
NUC2      1H
PCPD2     80.00 usec
PL2       -4.00 dB
PL12      10.83 dB
PL13      10.83 dB
PL2W      20.75849724 W
PL12W     0.68264657 W
PL13W     0.68264657 W
SFO2      400.1116004 MHz
SI        32768
SF        100.6077400 MHz
WDW        EM
SSB        0
LB         1.00 Hz
GB         0
PC         1.40
  
```

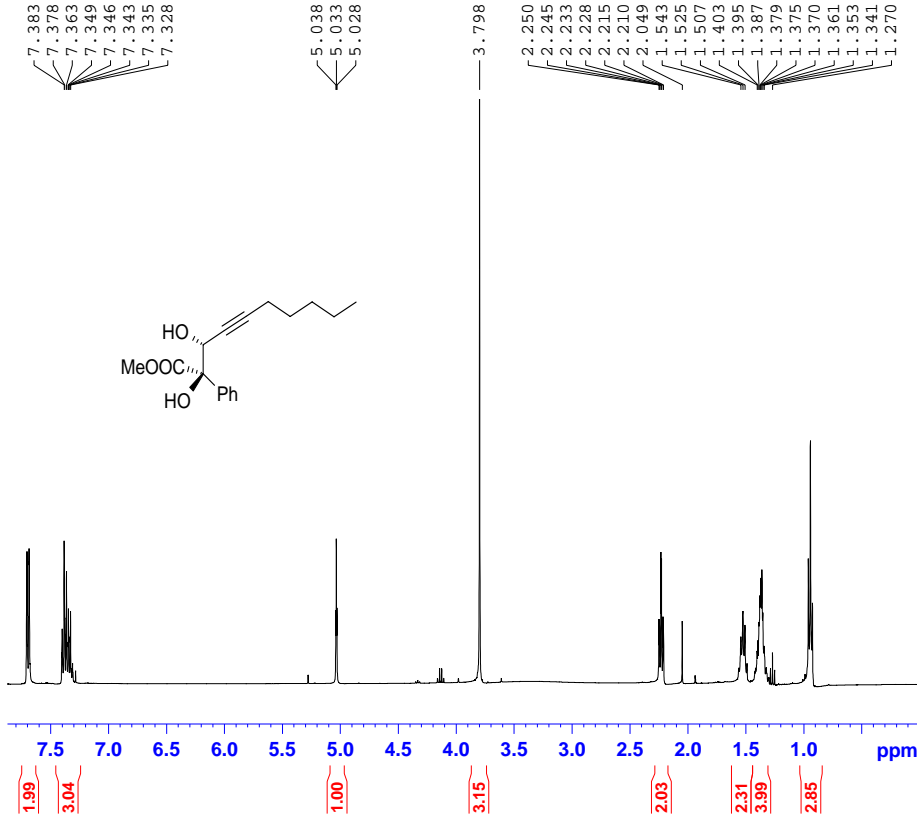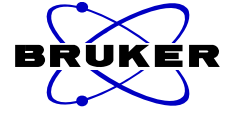

```

NAME      NHB1-2005252-179-1-A
EXPNO     1
PROCNO    1
Date_     20101115
Time      1.32
INSTRUM   spect
PROBHD    5 mm PABBO BB-
PULPROG   zg30
TD         65536
SOLVENT   CDCl3
NS         16
DS         2
SWH        8278.146 Hz
FIDRES     0.126314 Hz
AQ         3.9584243 sec
RG         22.6
DW         60.400 usec
DE         6.50 usec
TE         297.3 K
D1         1.00000000 sec
TDO        1

===== CHANNEL f1 =====
NUC1      1H
P1        14.50 usec
PL1       -4.00 dB
PL1W      20.75849724 W
SFO1      400.1124708 MHz
SI        32768
SF         400.1100000 MHz
WDW        EM
SSB        0
LB         0.30 Hz
GB         0
PC         1.00
  
```

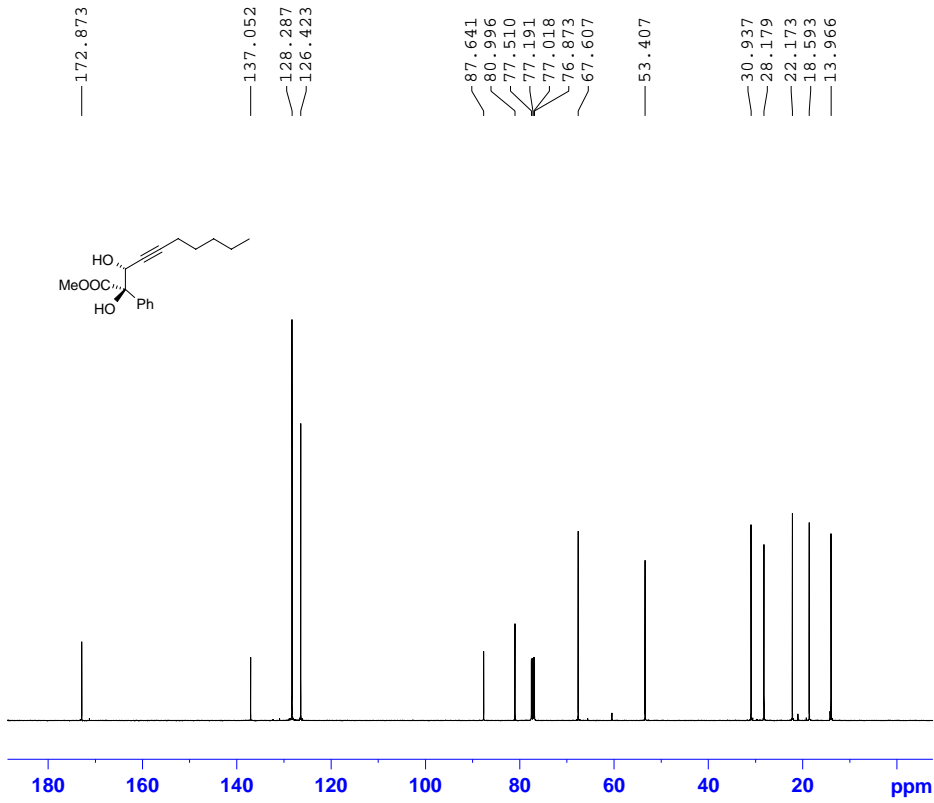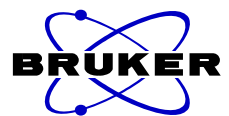

```

NAME      NHB1-2005252-179-1-A
EXPNO     2
PROCNO    1
Date_     20101115
Time      2.32
INSTRUM   spect
PROBHD    5 mm PABBO BB-
PULPROG   zgpg30
TD         65536
SOLVENT   CDCl3
NS         1024
DS         4
SWH        23980.814 Hz
FIDRES     0.365918 Hz
AQ         1.3664756 sec
RG         9195.2
DW         20.850 usec
DE         6.50 usec
TE         298.0 K
D1         2.00000000 sec
D11        0.03000000 sec
TDO        1

===== CHANNEL f1 =====
NUC1      13C
P1        9.20 usec
PL1       -2.00 dB
PL1W      61.30850601 W
SFO1      100.6178003 MHz

===== CHANNEL f2 =====
CPDPRG2   waltz16
NUC2      1H
PCPD2     80.00 usec
PL2       -4.00 dB
PL12      10.83 dB
PL13      10.83 dB
PL2W      20.75849724 W
PL12W     0.68264657 W
PL13W     0.68264657 W
SFO2      400.1116004 MHz
SI        32768
SF         100.6077400 MHz
WDW        EM
SSB        0
LB         1.00 Hz
GB         0
PC         1.40
  
```

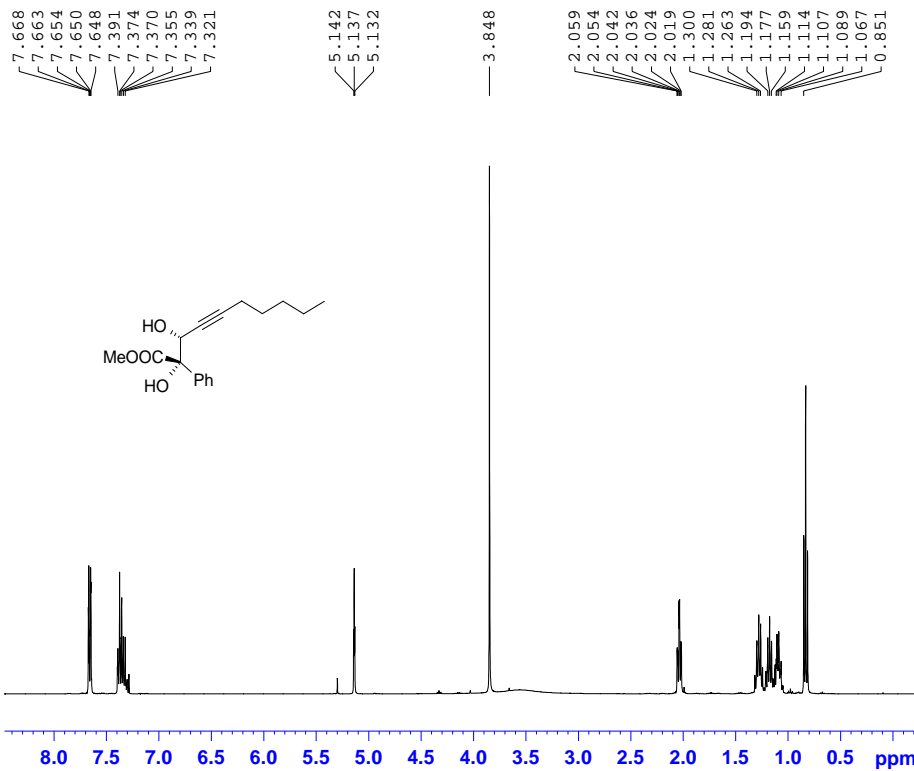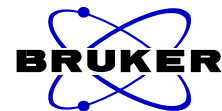

```

NAME      NHB1-2005252-179-2
EXPNO     1
PROCNO    1
Date_     20101115
Time      3.46
INSTRUM   spect
PROBHD    5 mm PABBO BB-
PULPROG   zg30
TD         65536
SOLVENT   CDCl3
NS         16
DS         2
SWH        8278.146 Hz
FIDRES    0.126314 Hz
AQ         3.9584243 sec
RG         35.9
DW         60.400 usec
DE         6.50 usec
TE         297.3 K
D1         1.00000000 sec
TD0        1
  
```

```

===== CHANNEL f1 =====
NUC1      1H
P1        14.50 usec
PL        -4.00 dB
PL1W      20.75849724 W
SFO1      400.1124708 MHz
SI         32768
SF         400.1100000 MHz
WDW        EM
SSB        0
LB         0.30 Hz
GB         0
PC         1.00
  
```

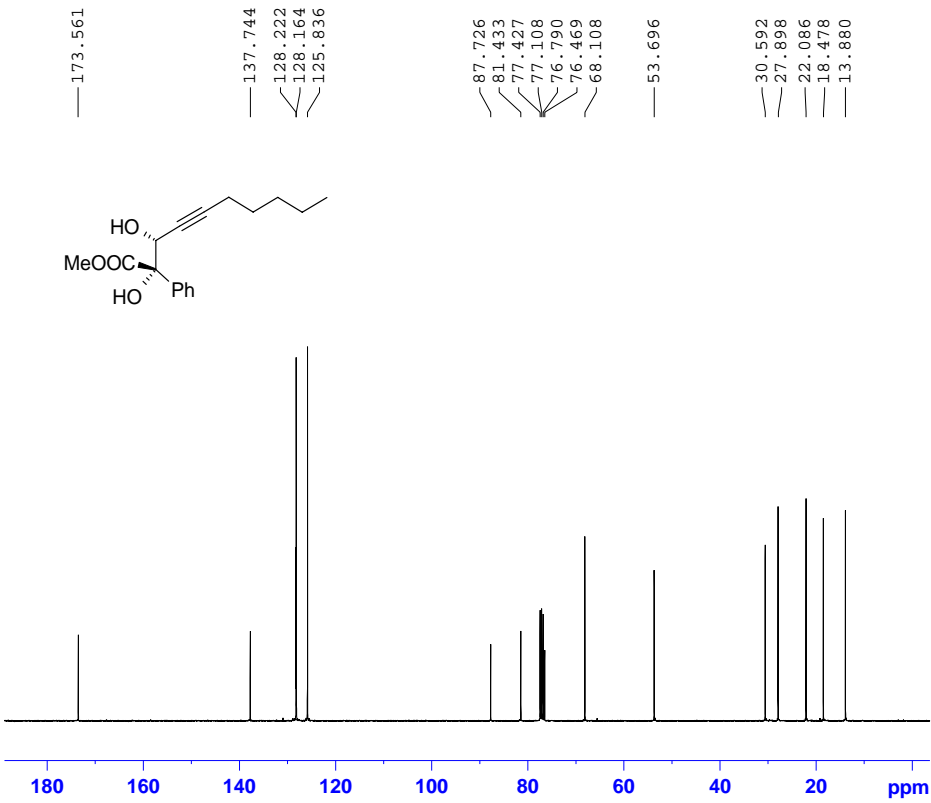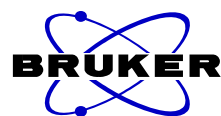

```

NAME      NHB1-2005252-179-2
EXPNO     2
PROCNO    1
Date_     20101115
Time      4.45
INSTRUM   spect
PROBHD    5 mm PABBO BB-
PULPROG   zgpg30
TD         65536
SOLVENT   CDCl3
NS         1024
DS         4
SWH        23980.814 Hz
FIDRES    0.365918 Hz
AQ         1.3664756 sec
RG         32768
DW         20.850 usec
DE         6.50 usec
TE         297.5 K
D1         2.00000000 sec
D11        0.03000000 sec
TD0        1
  
```

```

===== CHANNEL f1 =====
NUC1      13C
P1        9.20 usec
PL        -2.00 dB
PL1W      61.30850601 W
SFO1      100.6178003 MHz

===== CHANNEL f2 =====
CPDPRG2   waltz16
NUC2      1H
PCPD2     80.00 usec
PL2       -4.00 dB
PL12      10.83 dB
PL13      10.83 dB
PL2W      20.75849724 W
PL12W     0.68264657 W
PL13W     0.68264657 W
SFO2      400.1116004 MHz
SI         32768
SF         100.6077400 MHz
WDW        EM
SSB        0
LB         1.00 Hz
GB         0
PC         1.40
  
```

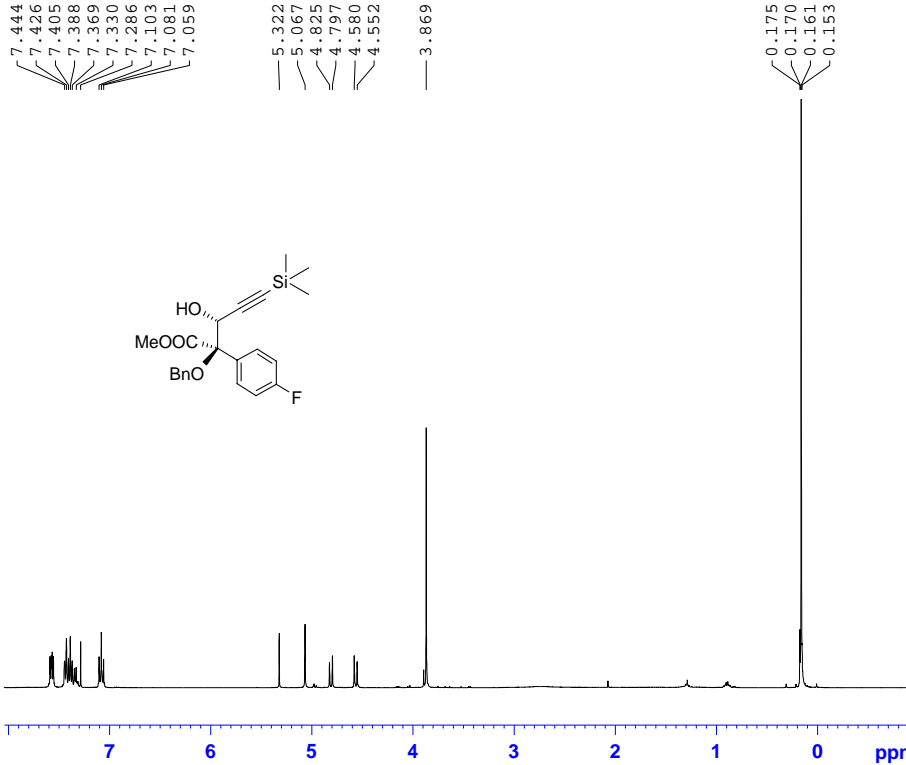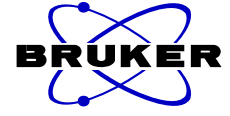

NAME NHB1-2005252-183-1  
EXPNO 1  
PROCNO 1  
Date\_ 20101116  
Time 20.02  
INSTRUM spect  
PROBHD 5 mm PABBO BB-  
PULPROG zg30  
TD 65536  
SOLVENT CDCl3  
NS 16  
DS 2  
SWH 8278.146 Hz  
FIDRES 0.126314 Hz  
AQ 3.9584243 sec  
RG 362  
DW 60.400 usec  
DE 6.50 usec  
TE 297.5 K  
D1 1.00000000 sec  
TD0 1

===== CHANNEL f1 =====  
NUC1 1H  
P1 14.50 usec  
PL -4.00 dB  
PL1W 20.75849724 W  
SFO1 400.1124708 MHz  
SI 32768  
SF 400.1100000 MHz  
WDW EM  
SSB 0  
LB 0.30 Hz  
GB 0  
PC 1.00

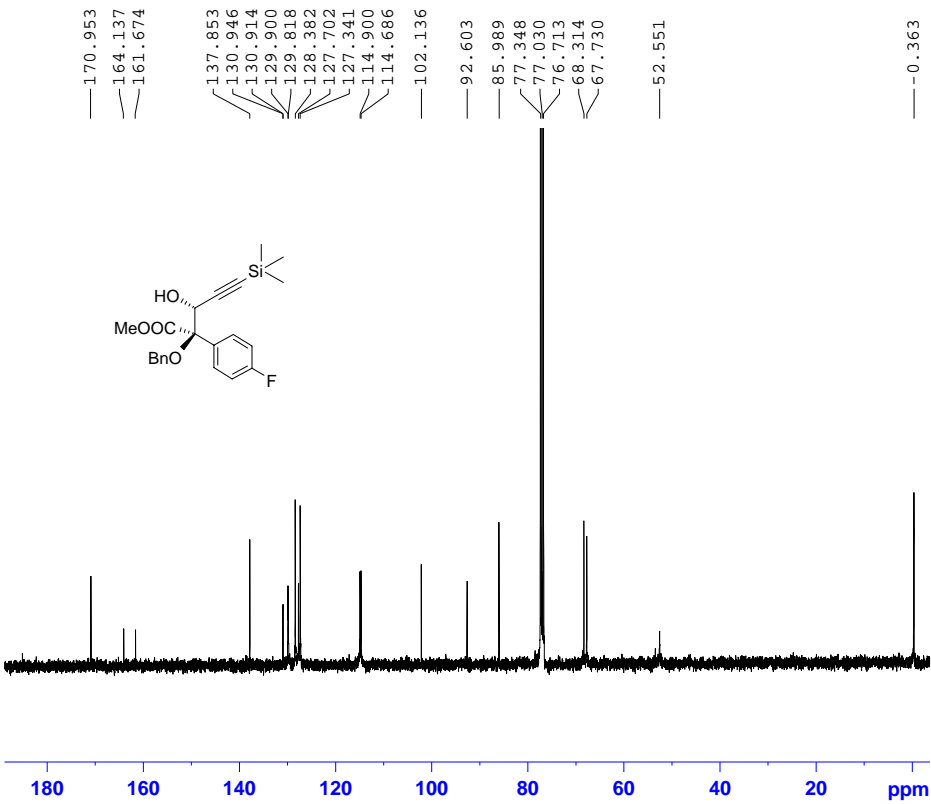

NAME NHB1-2005252-183-1  
EXPNO 2  
PROCNO 1  
Date\_ 20101116  
Time 21.02  
INSTRUM spect  
PROBHD 5 mm PABBO BB-  
PULPROG zgpg30  
TD 65536  
SOLVENT CDCl3  
NS 1024  
DS 4  
SWH 23980.814 Hz  
FIDRES 0.365918 Hz  
AQ 1.3664756 sec  
RG 9195.2  
DW 20.850 usec  
DE 6.50 usec  
TE 297.7 K  
D1 2.00000000 sec  
D11 0.03000000 sec  
TD0 1

===== CHANNEL f1 =====  
NUC1 13C  
P1 9.20 usec  
PL -2.00 dB  
PL1W 61.30850601 W  
SFO1 100.6178003 MHz

===== CHANNEL f2 =====  
CDDPRG2 waltz16  
NUC2 1H  
PCPD2 80.00 usec  
PL2 -4.00 dB  
PL12 10.83 dB  
PL13 10.83 dB  
PL2W 20.75849724 W  
PL12W 0.68264657 W  
PL13W 0.68264657 W  
SFO2 400.1116004 MHz  
SI 32768  
SF 100.6077400 MHz  
WDW EM  
SSB 0  
LB 1.00 Hz  
GB 0  
PC 1.40



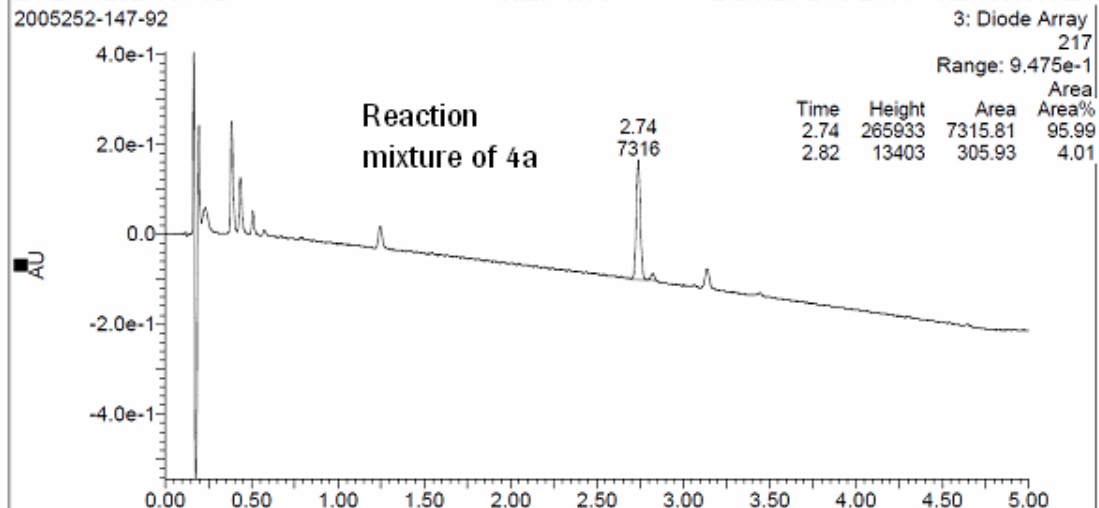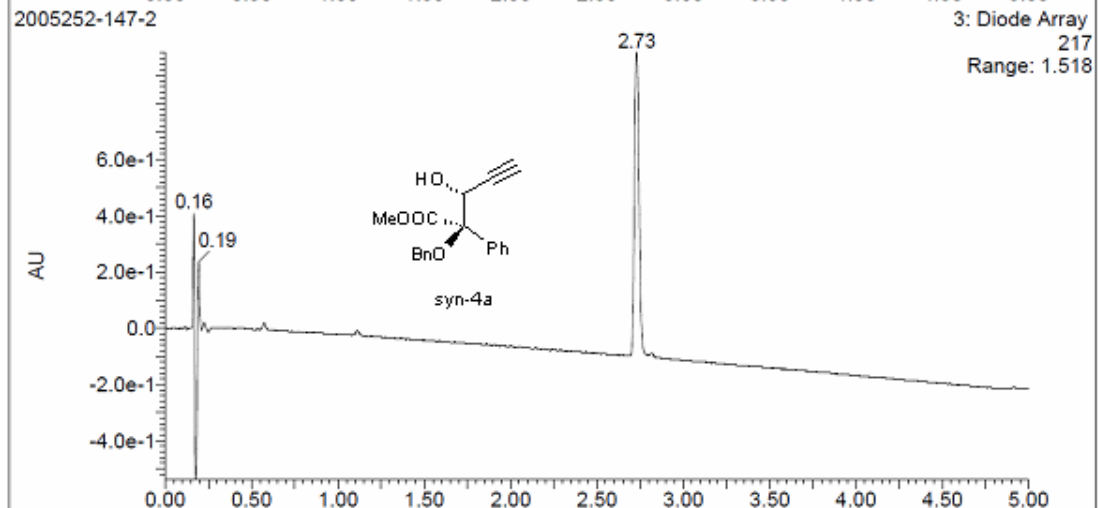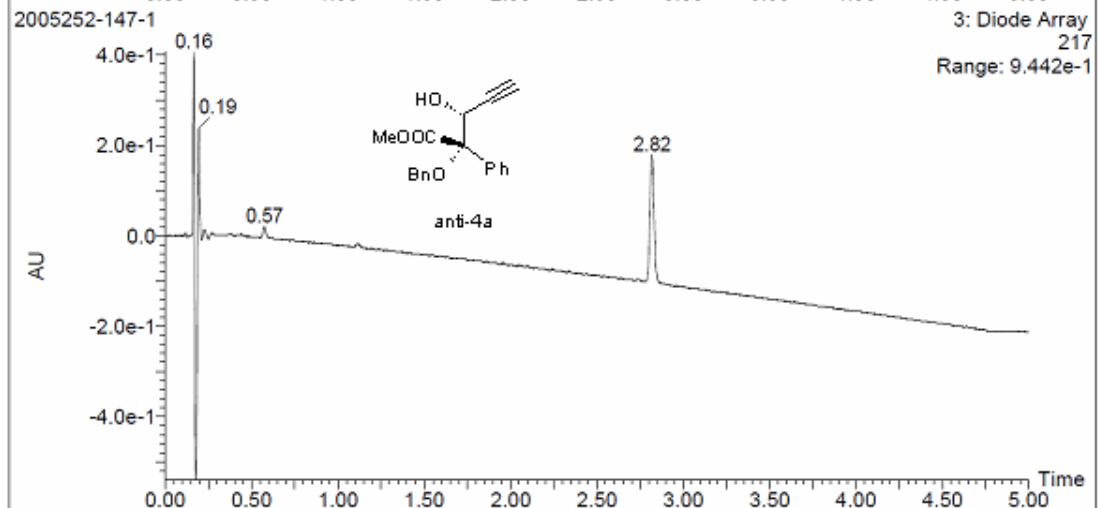

Supplement: c1ob05076a.pdf [file c1ob05076a.pdf]
